# Supplementary material for: Polyester nitrile N-oxides for click reactions synthesized with nitroalkane precursors as the initiator
Source: Royal Society of Chemistry journal article supplement (doi:10.1039/d0py00278j), 2020-01-01
Supplement: d0py00278j1.pdf [file d0py00278j1.pdf]

## Supporting Information

### Polyester Nitrile *N*-oxides for Click Reactions Synthesized with Nitroalkane Precursors as the Initiator

Toyokazu Tsutsuba<sup>a,c</sup>, Hiromitsu Sogawa<sup>a,d</sup>, and Toshikazu Takata<sup>\*a,b</sup>

<sup>a</sup>Department of Chemical Science and Engineering, Tokyo Institute of Technology 4259 Nagatsuta, Midori-ku, Yokohama 226-8503, Japan, <sup>b</sup>JST-CREST, <sup>c</sup>Division of Molecular Science, Faculty of Science and Technology, Gunma University, 1-5-1 Tenjin, Kiryu, Gunma 376-8515, Japan and <sup>d</sup>Biomacromolecules Research Team, RIKEN Center for Sustainable Resource Science, 2-1, Hirosawa, Wako-shi, Saitama, 351-0198, Japan.

#### Contents

|                                                   |     |
|---------------------------------------------------|-----|
| 1. Experimental section                           |     |
| 1.1 Materials and instrument                      | S2  |
| 1.2 Synthetic procedure and characterization data | S3  |
| 2. Spectrum data of new compounds                 | S14 |
| 3. References                                     | S40 |

## 1. Experimental Section

### 1.1 Materials and instrument

Dichloromethane was dehydrated by activated molecular sieve 4A.  $\delta$ -Valerolactone (VL) (>98%, TCI) and  $\epsilon$ -caprolactone (CL) were distilled over CaH<sub>2</sub> under reduced pressure. L-(-)-Lactide (LLA) (>98%, TCI), 1,8-diazabicyclo[5.4.0]-7-undecene (DBU) (>98%, TCI), phenyl isocyanate (>98%, TCI), triethylamine (Et<sub>3</sub>N) (>98%, Wako), allyltrimethylsilane (>98%, TCI), acetic anhydride (Ac<sub>2</sub>O) (>98%, TCI), diethyl phosphite (DPP) (>98%, TCI) and other commercially available solvents were used as received. 1,1-diphenylnitroethene was prepared according to literature.<sup>S1</sup> <sup>1</sup>H NMR (500 MHz) and <sup>13</sup>C NMR spectra (125 MHz) were recorded on a Bruker AVANCE III-HD 500 spectrometer using CDCl<sub>3</sub> as the solvent calibrated using residual undeuterated solvents or tetramethylsilane as the internal standard. FT-IR spectra were recorded on a JASCO FT/IR-230 spectrometer. FAB HR-MS were taken by JEOL JMS700 mass spectrometer at the Center for Advanced Materials Analysis, Tokyo Institute of Technology on request. Size exclusion chromatography (SEC) was carried out at 30 °C in CHCl<sub>3</sub> (0.85 mL/min) using a JASCO PU-2080 system equipped with a set of Shodex K-804 and Shodex K-805 columns. The number average molecular weight ( $M_n$ ), weight average molecular weight ( $M_w$ ) and polydispersity index (PDI) of the obtained polymers were calculated on the basis of a polystyrene calibration. Preparative GPC was carried out using a HPLC LC-918 instrument by Japan Analytical Industry with a set of Megapak-Gel 201C and Shodex K-2002.5. TGA analyses were carried out on a Shimadzu TGA-50 instrument under N<sub>2</sub> atmosphere (flow rate of 50 mL/min) to determine 5% weight decomposition temperatures ( $T_{d5}$ ) at which 5% weight loss was observed (heating rate of 10 °C/min). DSC analyses were carried out with a Shimadzu DSC-60 instrument at N<sub>2</sub> atmosphere (flow rate of 50 mL/min) with liquid N<sub>2</sub> as a refrigerant to determine a glass transition temperature ( $T_g$ ) and melting points ( $T_m$ ) (heating rate of 10 °C/min). MALDI-TOF mass spectra were determined on a Shimadzu AXIMA-CFR mass spectrometer. The spectrometer was equipped with a nitrogen laser ( $\lambda$  = 337 nm) and with pulsed ion extraction. The operation was performed at an accelerating potential of 20 kV by a linear-positive ion mode. The sample polymer solution (1.0 mg/mL) was prepared in THF, and dithranol (the matrix) and sodium trifluoroacetate (cationizing agent) were dissolved in THF (20 and 1 mg/mL, respectively), and 50  $\mu$ L of each solution was mixed prior to MALDI analysis.

## 1.2 Synthetic procedures and characterization data

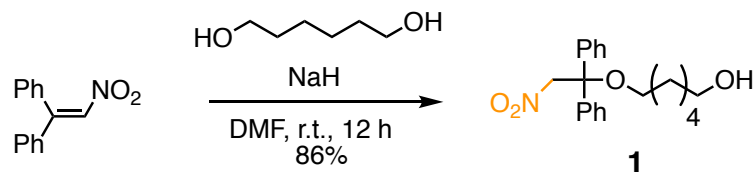

Scheme S1. Synthesis of **1**

Sodium hydride (1.5 g, 60 mmol) was washed with hexane. After the remaining hexane was removed, dry DMF (40 mL) was added, followed by the dropwise addition of the solution of 1,6-hexanediol (7.1 g, 60 mmol) in dry DMF (10 mL) at 0 °C. The resulting mixture was stirred at the same temperature for 1 h, and added to a solution of 1,1-diphenylnitroethene (4.1 g, 18 mmol) in dry DMF (10 mL). After stirring at room temperature for 12 h, the reaction was cold to 0 °C and quenched by a small amount of acetic acid. The mixture was diluted with dichloromethane, washed with 1.0 M HCl aq., water and brine, dried over anhydrous magnesium sulfate, filtered, and evaporated. The crude was purified by a silica gel column chromatography (eluent: hexane/ethyl acetate: 3/1) to obtain **1** in 86% yield (5.9 g) as a colorless liquid;  $^1\text{H}$  NMR (500 MHz, 298 K,  $\text{CDCl}_3$ )  $\delta$  7.36–7.25 (m, 10H, Ph–H), 5.34 (s, 2H), 3.65–3.62 (m, 2H), 3.36 (t,  $J$  = 4.2 Hz, 2H), 1.67–1.36 (m, 4H), 2.36 (br, 1H) ppm;  $^{13}\text{C}$  NMR (125 MHz, 298 K,  $\text{CDCl}_3$ )  $\delta$  141.7, 128.3, 127.9, 126.5, 81.2, 79.8, 62.9, 32.6, 29.6, 25.8, 25.4 (C2) ppm; FAB-HRMS ( $m/z$ ) calc'd for  $\text{C}_{20}\text{H}_{26}\text{NO}_4$   $[\text{M}+\text{H}]^+$ , 344.1862; found, 344.1869.

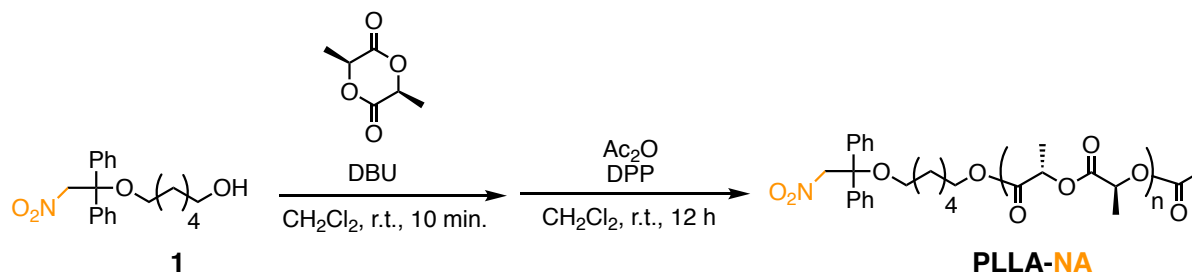

Scheme S2. Synthesis of **PLLA-NA**

DBU was added to a solution of **1** and LLA in dry  $\text{CH}_2\text{Cl}_2$  under argon atmosphere, and the mixture was stirred for 10 min at room temperature. The resulting mixture was poured into ethanol/ hexane = 1/ 9 (v/ v) and collected the precipitate to obtain OH-terminated PLLA.  $\text{Ac}_2\text{O}$ , DPP and OH-terminated PLLA were dissolved in dry  $\text{CH}_2\text{Cl}_2$  and the mixture was stirred for 12 h. The resulting mixture was poured into ethanol/ hexane = 1/ 9 (v/ v) and collected the precipitate to obtain **PLLA-NA** as a white powder;  $^1\text{H}$  NMR (500 MHz, 298 K,  $\text{CDCl}_3$ )  $\delta$  7.38–7.25 (m, 10H), 5.36 (s, 2H), 5.22–5.13 (m,  $n \times 2\text{H}$ ), 4.15–4.10 (m, 2H), 3.36 (t,  $J$  = 4.0 Hz, 2H), 2.13 (s, 3H), 1.71–1.50 (m,  $n \times 6\text{H}$ ), 1.67–1.36 (m, 4H) ppm.

**PLLA<sub>20</sub>-NA** ([LLA] / [1] =20, [M] / [DBU] = 100, [M] = 0.1 M)

DBU (15  $\mu$ L, 0.10 mmol), **1** (0.17 g, 0.50 mmol), LLA (1.4 g, 10 mmol), and dry CH<sub>2</sub>Cl<sub>2</sub> (10 mL) were used for polymerization. Ac<sub>2</sub>O (1.5 g, 15 mmol), DPP (0.33 g, 1.5 mmol) and dry CH<sub>2</sub>Cl<sub>2</sub> (5.0 mL) were used for acetylation. The precipitate was dried to give **PLLA<sub>20</sub>-NA** in 95% yield (1.5 g);  $M_{n(\text{NMR})}$  3300 g/mol,  $DP_{n(\text{NMR})}$  20,  $M_{n(\text{SEC})}$  4000 g/mol, PDI 1.12;  $T_g$  43.4 °C;  $T_m$  140 °C;  $T_{d5}$  279 °C.

**PLLA<sub>51</sub>-NA** ([LLA] / [1] =50, [M] / [DBU] = 100, [M] = 0.1 M)

DBU (37  $\mu$ L, 0.25 mmol), **1** (0.17 g, 0.50 mmol), LLA (3.6 g, 25 mmol), and dry CH<sub>2</sub>Cl<sub>2</sub> (25 mL) were used for polymerization. Ac<sub>2</sub>O (1.5 g, 15 mmol), DPP (0.33 g, 1.5 mmol) and dry CH<sub>2</sub>Cl<sub>2</sub> (5.0 mL) were used for acetylation. The precipitate was dried to give **PLLA<sub>51</sub>-NA** in 98% yield (3.7 g);  $M_{n(\text{NMR})}$  7700 g/mol,  $DP_{n(\text{NMR})}$  51,  $M_{n(\text{SEC})}$  9800 g/mol, PDI 1.08;  $T_g$  49.1 °C;  $T_m$  147 °C;  $T_{d5}$  326 °C.

**PLLA<sub>98</sub>-NA** ([LLA] / [1] =100, [M] / [DBU] = 100, [M] = 0.1 M)

DBU (37  $\mu$ L, 0.25 mmol), **1** (86 mg, 0.25 mmol), LLA (3.6 g, 25 mmol), and dry CH<sub>2</sub>Cl<sub>2</sub> (25 mL) were used for polymerization. Ac<sub>2</sub>O (0.77 g, 7.5 mmol), DPP (0.18 g, 0.75 mmol) and dry CH<sub>2</sub>Cl<sub>2</sub> (2.5 mL) were used for acetylation. The precipitate was dried to give **PLLA<sub>98</sub>-NA** in 99% yield (3.7 g);  $M_{n(\text{NMR})}$  14500 g/mol,  $DP_{n(\text{NMR})}$  98,  $M_{n(\text{SEC})}$  18700 g/mol, PDI 1.05;  $T_g$  51.5 °C;  $T_m$  150 °C;  $T_{d5}$  332 °C.

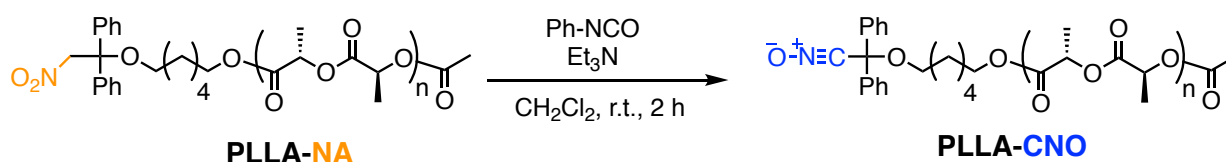

Scheme S3. Synthesis of **PLLA-CNO**

To a solution of **PLLA-NA** and triethylamine in dry CH<sub>2</sub>Cl<sub>2</sub> was added phenylisocyanate at room temperature, and the mixture was stirred for 2 h under argon atmosphere. After the consumption of **PLLA-NA**, generated phenylurea was removed by filtration and solvent was removed by evaporation. The crude was poured into ethanol/ hexane = 2/8 (v/ v) and collected the precipitate to obtain **PLLA-CNO** as a white powder; <sup>1</sup>H NMR (500 MHz, 298 K, CDCl<sub>3</sub>)  $\delta$  7.42–7.36 (m, 10H), 5.22–5.13 (m,  $n \times 2$ H), 4.15–4.10 (m, 2H), 3.45 (t,  $J$  = 4.0 Hz, 2H), 2.13 (s, 3H), 1.71–1.50 (m,  $n \times 6$ H), 1.67–1.36 (m, 4H) ppm; IR (NaCl):  $\nu$  2995, 2943, 2877, 2275, 1758, 1453, 1382, 1363, 1309, 1270, 1213, 1184, 1130, 1097, 1047, 871, 757 cm<sup>-1</sup>.

### PLLA<sub>20</sub>-CNO

**PLLA<sub>20</sub>-NA** (1.4 g, 0.44 mmol), phenylisocyanate (0.52 g, 4.4 mmol), triethylamine (0.66 g, 6.6 mmol), and dry CH<sub>2</sub>Cl<sub>2</sub> (44 mL) were used for reaction. The precipitate was dried to give **PLLA<sub>20</sub>-CNO** in 92% yield (1.3 g);  $M_{n(\text{NMR})}$  3300 g/mol,  $DP_{n(\text{NMR})}$  20,  $M_{n(\text{SEC})}$  4000 g/mol, PDI 1.12;  $T_g$  43.2 °C;  $T_m$  140 °C;  $T_{d5}$  276 °C.

### PLLA<sub>51</sub>-CNO

**PLLA<sub>51</sub>-NA** (3.5 g, 0.47 mmol), phenylisocyanate (0.56 g, 4.7 mmol), triethylamine (0.72 g, 7.2 mmol), and dry CH<sub>2</sub>Cl<sub>2</sub> (47 mL) were used for reaction. The precipitate was dried to give **PLLA<sub>51</sub>-CNO** in 93% yield (3.4 g);  $M_{n(\text{NMR})}$  7700 g/mol,  $DP_{n(\text{NMR})}$  51,  $M_{n(\text{SEC})}$  9800 g/mol, PDI 1.09;  $T_g$  49.6 °C;  $T_m$  148 °C;  $T_{d5}$  309 °C.

### PLLA<sub>98</sub>-CNO

**PLLA<sub>98</sub>-NA** (3.5 g, 0.23 mmol), phenylisocyanate (0.27 g, 2.3 mmol), triethylamine (0.35 g, 3.5 mmol), and dry CH<sub>2</sub>Cl<sub>2</sub> (23 mL) were used for reaction. The precipitate was dried to give **PLLA<sub>98</sub>-CNO** in 93% yield (3.4 g);  $M_{n(\text{NMR})}$  14500 g/mol,  $DP_{n(\text{NMR})}$  98,  $M_{n(\text{SEC})}$  18700 g/mol, PDI 1.08;  $T_g$  52.6 °C;  $T_m$  151 °C;  $T_{d5}$  328 °C.

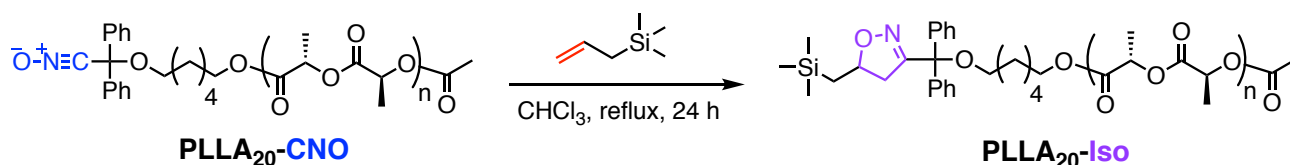

Scheme S4. Synthesis of **PLLA<sub>20</sub>-Iso**

**PLLA<sub>20</sub>-CNO** (0.17 g, 0.05 mmol) and allyltrimethylsilane (57 mg, 0.50 mmol) were dissolved in CHCl<sub>3</sub> (5.0 mL) and the reaction mixture was refluxed for 24 h. After cooling to room temperature, solvent and excess amount of allyltrimethylsilane were removed under reduced pressure to give the **PLLA<sub>20</sub>-Iso** in >99% yield (0.18 g) as a white powder; <sup>1</sup>H NMR (500 MHz, 298 K, CDCl<sub>3</sub>)  $\delta$  7.57–7.53 (m, 4H), 7.30–7.24 (m, 6H), 5.22–5.13 (m,  $n \times 2$ H), 4.63–4.59 (m, 1H), 4.15–4.10 (m, 2H), 3.20 (t,  $J = 4.0$  Hz, 2H), 2.91–2.82 (m, 1H), 2.40–2.30 (m, 1H), 2.13 (s, 3H), 1.71–1.50 (m,  $n \times 6$ H), 1.67–1.36 (m, 4H), 1.13–1.06 (m, 1H), 0.86–0.80 (m, 1H), 0.00 (s, 9H) ppm;  $DP_{n(\text{NMR})}$  20,  $M_{n(\text{NMR})}$  3400 g/mol,  $M_{n(\text{SEC})}$  4100 g/mol, PDI 1.12.

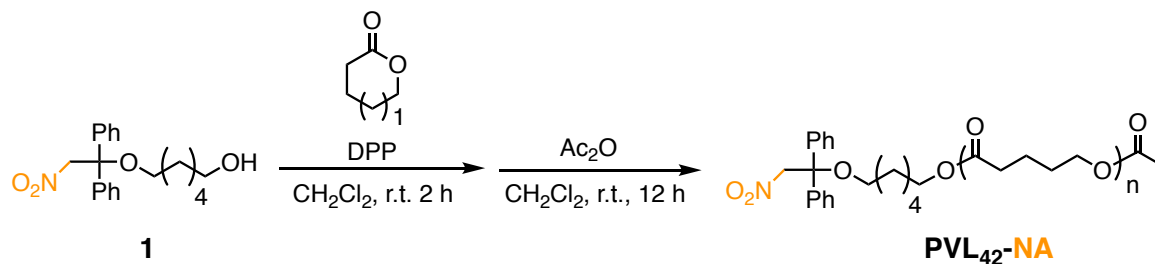

Scheme S5. Synthesis of **PVL<sub>42</sub>-NA**

DPP (0.13 g, 0.50 mmol) was added to a solution of **1** (0.17 g, 0.50 mmol) and VL (2.5 g, 25 mmol) in dry CH<sub>2</sub>Cl<sub>2</sub> (25 mL), the mixture was stirred for 2 h at room temperature. Then, Ac<sub>2</sub>O (1.5 g, 15 mmol) was added to the mixture and further mixture was stirred for 12 h at same temperature. The resulting mixture was poured into ethanol/hexane = 1/9 (v/v) and collected the precipitate to obtain **PVL<sub>42</sub>-NA** (1.8 g, 67%) as a white powder; <sup>1</sup>H NMR (500 MHz, 298 K, CDCl<sub>3</sub>) δ 7.38–7.25 (m, 10H), 5.36 (s, 2H), 4.11–4.05 (m, n × 2H), 3.37 (t, *J* = 4.0 Hz, 2H), 2.49–2.35 (m, n × 2H), 2.05 (s, 3H), 1.73–1.65 (m, n × 4H), 1.67–1.36 (m, 4H) ppm; *M<sub>n</sub>*(NMR) 4600 g/mol, *DP<sub>n</sub>*(NMR) 42, *M<sub>n</sub>*(SEC) 7000 g/mol, PDI 1.18; *T<sub>m</sub>* 50.9 °C; *T<sub>d5</sub>* 262 °C.

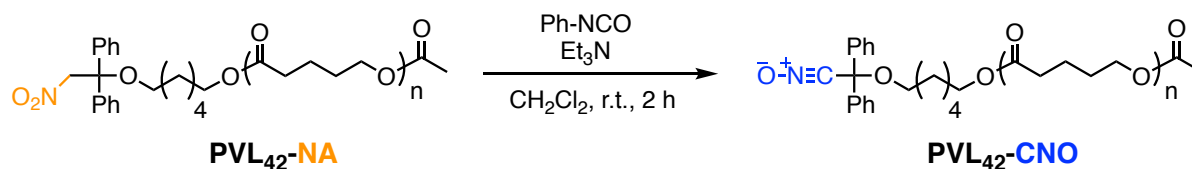

Scheme S6. Synthesis of **PVL<sub>42</sub>-CNO**

To a solution of **PVL<sub>42</sub>-NA** (1.5 g, 0.33 mmol) and triethylamine (0.50 g, 5.0 mmol) in dry CH<sub>2</sub>Cl<sub>2</sub> (33 mL) was added phenylisocyanate (0.39 g, 3.3 mmol) at room temperature, and the mixture was stirred for 2 h under argon atmosphere. After the consumption of **PVL<sub>42</sub>-NA**, generated phenylurea was removed by filtration and solvent was removed by evaporation. The crude was poured into ethanol/ hexane = 2/8 (v/ v) and collected the precipitate to obtain **PVL<sub>42</sub>-CNO** (1.4 g, 94%) as a white powder; <sup>1</sup>H NMR (500 MHz, 298 K, CDCl<sub>3</sub>) δ 7.42–7.35 (m, 10H), 4.11–4.05 (m, n × 2H), 3.45 (t, *J* = 4.0 Hz, 2H), 2.49–2.35 (m, n × 2H), 2.05 (s, 3H), 1.73–1.65 (m, n × 4H), 1.67–1.36 (m, 4H) ppm; IR (NaCl): ν 2960, 2894, 2874, 2275, 1732, 1474, 1461, 1423, 1402, 1383, 1325, 1259, 1180, 1106, 1067, 1047, 953, 916, 702 cm<sup>-1</sup>; *M<sub>n</sub>*(NMR) 4600 g/mol, *DP<sub>n</sub>*(NMR) 42, *M<sub>n</sub>*(SEC) 7200 g/mol, PDI 1.21; *T<sub>m</sub>* 51.6 °C; *T<sub>d5</sub>* 316 °C.

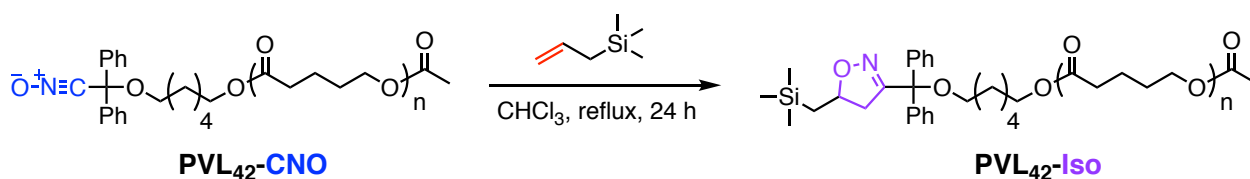

Scheme S7. Synthesis of **PVL<sub>42</sub>-Iso**

**PVL<sub>42</sub>-CNO** (0.23 g, 0.05 mmol) and allyltrimethylsilane (57 mg, 0.50 mmol) were dissolved in  $\text{CHCl}_3$  (5.0 mL) and the reaction mixture was refluxed for 24 h. After cooling to room temperature, solvent and excess amount of allyltrimethylsilane were removed under reduced pressure to give the **PVL<sub>42</sub>-Iso** in >99% yield (0.24 g) as a white powder;  $^1\text{H}$  NMR (500 MHz, 298 K,  $\text{CDCl}_3$ )  $\delta$  7.57–7.53 (m, 4H), 7.30–7.24 (m, 6H), 4.63–4.59 (m, 1H), 4.11–4.05 (m,  $n \times 2\text{H}$ ), 3.20 (t,  $J = 4.0$  Hz, 2H), 2.89–2.83 (m, 1H), 2.49–2.35 (m,  $n \times 2\text{H}$ ), 2.40–2.30 (m, 1H), 2.05 (s, 3H), 1.73–1.65 (m,  $n \times 4\text{H}$ ), 1.67–1.36 (m, 4H), 1.13–1.06 (m, 1H), 0.86–0.80 (m, 1H), 0.00 (s, 9H) ppm;  $\text{DP}_{\text{n(NMR)}}$  42,  $M_{\text{n(NMR)}}$  4700 g/mol,  $M_{\text{n(SEC)}}$  7300 g/mol, PDI 1.22.

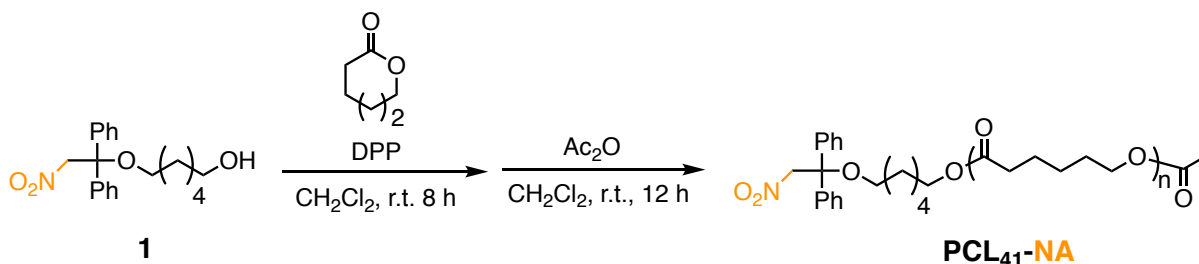

Scheme S8. Synthesis of **PCL<sub>41</sub>-NA**

Diphenylphosphate (0.25 g, 1.0 mmol) was added to a solution of **1** (0.34 g, 1.0 mmol) and CL (5.7 g, 50 mmol) in dry  $\text{CH}_2\text{Cl}_2$  (50 mL), the mixture was stirred for 8 h at room temperature. Then,  $\text{Ac}_2\text{O}$  (3.1 g, 30 mmol) was added to the mixture and further mixture was stirred for 12 h at same temperature. The resulting mixture was poured into ethanol/hexane = 1/9 (v/v) and collected the precipitate to obtain **PCL<sub>41</sub>-NA** (4.8 g, 80%) as a white powder;  $^1\text{H}$  NMR (500 MHz, 298 K,  $\text{CDCl}_3$ )  $\delta$  7.38–7.25 (m, 10H), 5.35 (s, 2H), 4.11–4.05 (m,  $n \times 2\text{H}$ ), 3.35 (t,  $J = 4.0$  Hz, 2H), 2.49–2.35 (m,  $n \times 2\text{H}$ ), 2.04 (s, 3H), 1.73–1.65 (m,  $n \times 4\text{H}$ ), 1.40–1.32 (m,  $n \times 2\text{H}$ ), 1.67–1.36 (m, 4H) ppm;  $M_{\text{n(NMR)}}$  5100 g/mol,  $\text{DP}_{\text{n(NMR)}}$  41,  $M_{\text{n(SEC)}}$  7800 g/mol, PDI 1.09;  $T_{\text{m}}$  51.1 °C;  $T_{\text{d5}}$  319 °C.

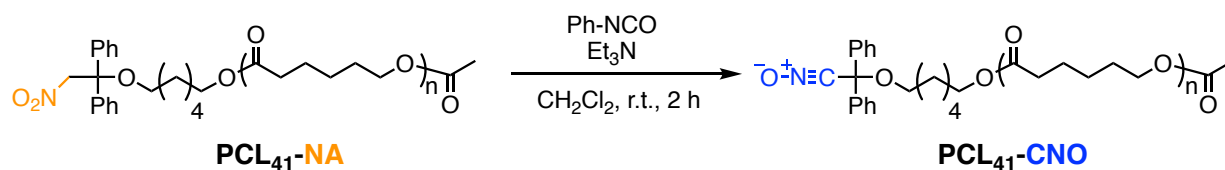

Scheme S9. Synthesis of **PCL<sub>41</sub>-CNO**

To a solution of **PCL<sub>41</sub>-NA** (2.0 g, 0.39 mmol) and triethylamine (0.59 g, 5.9 mmol) in dry  $\text{CH}_2\text{Cl}_2$  (39 mL) was added phenylisocyanate (0.46 g, 3.9 mmol) at room temperature, and the mixture was stirred for 2 h under argon atmosphere. After the consumption of **PCL<sub>41</sub>-NA**, generated phenylurea was removed by filtration and solvent was removed by evaporation. The crude was poured into ethanol/ hexane = 2/8 (v/ v) and collected the precipitate to obtain **PCL<sub>41</sub>-CNO** (1.7 g, 86%) as a white powder;  $^1\text{H}$  NMR (500 MHz, 298 K,  $\text{CDCl}_3$ )  $\delta$  7.42–7.35 (m, 10H), 4.11–4.05 (m,  $n \times 2\text{H}$ ), 3.45 (t,  $J = 4.0$  Hz, 2H), 2.49–2.35 (m,  $n \times 2\text{H}$ ), 2.04 (s, 3H), 1.73–1.65 (m,  $n \times 4\text{H}$ ), 1.40–1.32 (m,  $n \times 2\text{H}$ ), 1.67–1.36 (m, 4H) ppm; IR (NaCl):  $\nu$  2943, 2910, 2864, 2275, 1724, 1470, 1419, 1398, 1365, 1294, 1242, 1189, 1108, 1065, 1048, 961, 935, 702  $\text{cm}^{-1}$ ;  $M_{\text{n}}(\text{NMR})$  5100 g/mol,  $\text{DP}_{\text{n}}(\text{NMR})$  41,  $M_{\text{n}}(\text{SEC})$  7800 g/mol, PDI 1.10;  $T_{\text{m}}$  52.0  $^{\circ}\text{C}$ ;  $T_{\text{d}5}$  332  $^{\circ}\text{C}$ .

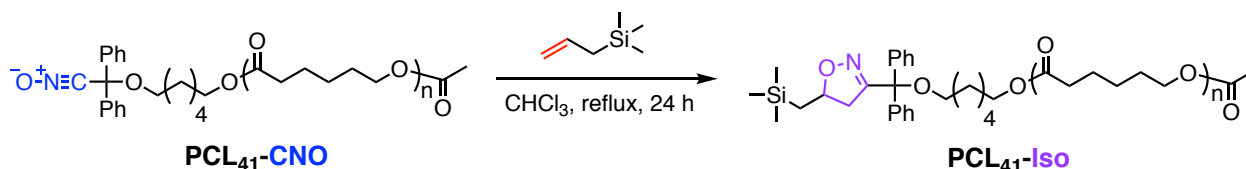

Scheme S10. Synthesis of **PCL<sub>41</sub>-Iso**

**PCL<sub>41</sub>-CNO** (0.24 g, 0.05 mmol) and allyltrimethylsilane (57 mg, 0.50 mmol) were dissolved in  $\text{CHCl}_3$  (5.0 mL) and the reaction mixture was refluxed for 24 h. After cooling to room temperature, solvent and excess amount of allyltrimethylsilane were removed under reduced pressure to give the **PCL<sub>41</sub>-Iso** in >99% yield (0.25 g) as a white powder;  $^1\text{H}$  NMR (500 MHz, 298 K,  $\text{CDCl}_3$ )  $\delta$  7.57–7.53 (m, 4H), 7.30–7.24 (m, 6H), 4.64–4.60 (m, 1H), 4.11–4.05 (m,  $n \times 2\text{H}$ ), 3.21 (t,  $J = 4.0$  Hz, 2H), 2.88–2.84 (m, 1H), 2.49–2.35 (m,  $n \times 2\text{H}$ ), 2.40–2.30 (m, 1H), 2.04 (s, 3H), 1.73–1.65 (m,  $n \times 4\text{H}$ ), 1.41–1.32 (m,  $n \times 2\text{H}$ ), 1.67–1.36 (m, 4H), 1.14–1.05 (m, 1H), 0.87–0.82 (m, 1H), 0.00 (s, 9H) ppm;  $\text{DP}_{\text{n}}(\text{NMR})$  41,  $M_{\text{n}}(\text{NMR})$  5200 g/mol,  $M_{\text{n}}(\text{SEC})$  7900 g/mol, PDI 1.12.



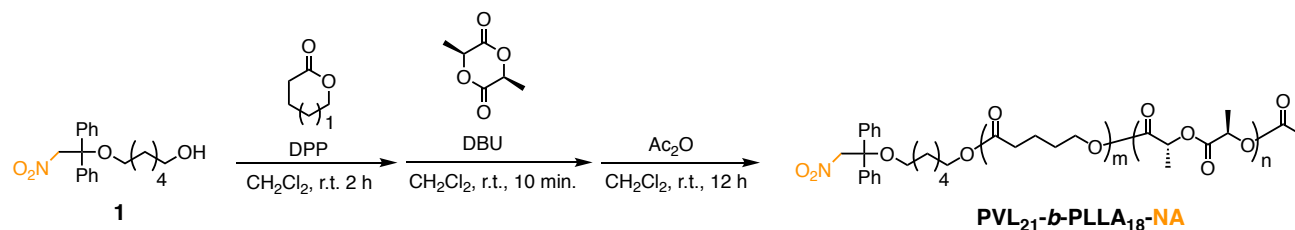

Scheme S11. Synthesis of **PVL<sub>21</sub>-*b*-PLLA<sub>18</sub>-NA**

Diphenylphosphate (0.25 g, 1.0 mmol) was added to a solution of **1** (0.34 g, 1.0 mmol) and VL (2.0 g, 20 mmol) in dry CH<sub>2</sub>Cl<sub>2</sub> (20 mL), the mixture was stirred for 2 h at room temperature. The resulting mixture was poured into ethanol/hexane = 1/9 (v/v) and collected the precipitate to obtain **PVL<sub>21</sub>-NAOH**. Subsequently, DBU (14 mg, 0.09 mmol) was added to a solution of **PVL<sub>21</sub>-NAOH** (1.1 g, 0.45 mmol) and LLA (1.2 g, 9.0 mmol) in CH<sub>2</sub>Cl<sub>2</sub> (9.0 mL), the mixture was stirred for 10 min at room temperature. The resulting mixture was poured into ethanol/ hexane = 1/ 9 (v/ v) and collected the precipitate. Ac<sub>2</sub>O (1.4 g, 14 mmol), DPP (0.34 g, 1.4 mmol) and obtained polymer were dissolved in CH<sub>2</sub>Cl<sub>2</sub> (9.0 mL) and the mixture was stirred for 12 h. The resulting mixture was poured into ethanol/ hexane = 1/ 9 (v/ v) and collected the precipitate to obtain **PVL<sub>21</sub>-*b*-PLLA<sub>18</sub>-NA** in 44% yield (2.3 g) as a white powder;  $\delta$  7.38–7.25 (m, 10H), 5.36 (s, 2H), 5.22–5.13 (m,  $n \times 2\text{H}$ ), 4.11–4.05 (m,  $n \times 2\text{H}$ ), 3.35 (t,  $J = 4.0$  Hz, 2H), 2.49–2.35 (m,  $n \times 2\text{H}$ ), 2.13 (s, 3H), 1.73–1.65 (m,  $n \times 4\text{H}$ ), 1.71–1.50 (m,  $n \times 6\text{H}$ ), 1.67–1.36 (m, 4H) ppm;  $M_{\text{n(NMR)}}$  5100 g/mol,  $\text{DP}_{\text{n(NMR, PVL)}}$  21,  $\text{DP}_{\text{n(NMR, PLLA)}}$  18,  $M_{\text{n(SEC, PVL-NAOH)}}$  4800 g/mol,  $M_{\text{n(SEC)}}$  14600 g/mol,  $\text{PDI}_{(\text{PVL-NAOH})}$  1.22,  $\text{PDI}$  1.12;  $T_{\text{m}}$  141 °C;  $T_{\text{d5}}$  202 °C.

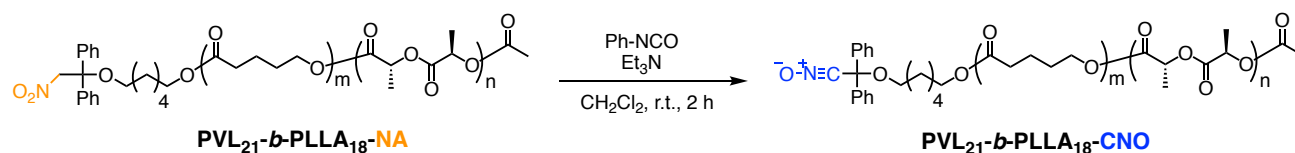

Scheme S12. Synthesis of **PVL<sub>21</sub>-*b*-PLLA<sub>18</sub>-CNO**

To a solution of **PCL<sub>21</sub>-*b*-PLLA<sub>18</sub>-NA** (1.9 g, 0.37 mmol) and triethylamine (0.57 g, 5.6 mmol) in dry CH<sub>2</sub>Cl<sub>2</sub> (37 mL) was added phenylisocyanate (0.45 g, 3.7 mmol) at room temperature and the mixture was stirred for 2 h under argon atmosphere. After the consumption of **PCL<sub>21</sub>-*b*-PLLA<sub>18</sub>-NA**, generated phenylurea was removed by filtration and solvent was removed by evaporation. The crude was poured into ethanol/ hexane = 2/8 (v/ v) and collected the precipitate to obtain **PCL<sub>21</sub>-*b*-PLLA<sub>18</sub>-CNO** (1.7 g, 86%) as a white powder;  $\delta$  7.42–7.35 (m, 10H), 5.22–5.13 (m,  $n \times 2\text{H}$ ), 4.11–4.05 (m,  $n \times 2\text{H}$ ), 3.46 (t,  $J = 4.0$  Hz, 2H), 2.49–2.35 (m,  $n \times 2\text{H}$ ), 2.13 (s, 3H), 1.73–1.65 (m,  $n \times 4\text{H}$ ), 1.71–1.50 (m,  $n \times 6\text{H}$ ), 1.67–1.36 (m, 4H) ppm; IR (NaCl):  $\nu$  2997, 2947, 2897, 2275, 1758, 1735, 1455, 1420, 1385, 1358, 1316, 1294, 1268, 1246, 1213, 1185, 1132, 1094, 1046, 960, 872, 756, 703 cm<sup>-1</sup>;  $M_{\text{n}}(\text{NMR})$  5100 g/mol,  $\text{DP}_{\text{n}}(\text{NMR}, \text{PVL})$  21,  $\text{DP}_{\text{n}}(\text{NMR}, \text{PLLA})$  18,  $M_{\text{n}}(\text{SEC})$  14700 g/mol, PDI 1.14;  $T_{\text{m}}$  142 °C;  $T_{\text{d}5}$  315 °C.

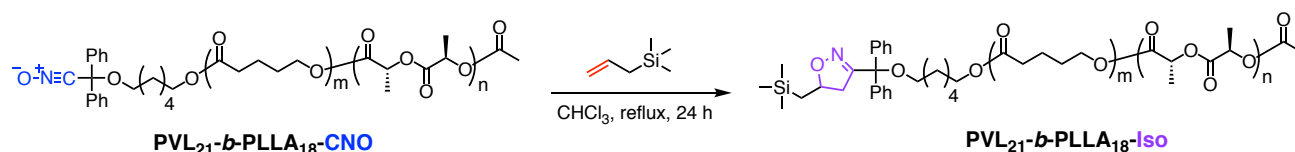

Scheme S13. Synthesis of **PVL<sub>21</sub>-*b*-PLLA<sub>18</sub>-Iso**

**PVL<sub>21</sub>-*b*-PLLA<sub>18</sub>-CNO** (0.15 g, 0.03 mmol) and allyltrimethylsilane (34 mg, 0.30 mmol) were dissolved in CHCl<sub>3</sub> (3.0 mL) and the reaction mixture was refluxed for 24 h. After cooling to room temperature, solvent and excess amount of allyltrimethylsilane were removed under reduced pressure to give **PVL<sub>21</sub>-*b*-PLLA<sub>18</sub>-Iso** in >99% yield (0.16 g) as a white powder; <sup>1</sup>H NMR (500 MHz, 298 K, CDCl<sub>3</sub>)  $\delta$  7.57–7.53 (m, 4H), 7.30–7.24 (m, 6H), 5.21–5.11 (m,  $n \times 2\text{H}$ ), 4.64–4.60 (m, 1H), 4.10–4.05 (m,  $n \times 2\text{H}$ ), 3.21 (t,  $J = 4.0$  Hz, 2H), 2.88–2.84 (m, 1H), 2.48–2.30 (m,  $n \times 2\text{H}$ ), 2.40–2.30 (m, 1H), 2.13 (s, 3H), 1.71–1.50 (m,  $n \times 6\text{H}$ ), 1.73–1.65 (m,  $n \times 4\text{H}$ ), 1.67–1.36 (m, 4H), 1.14–1.05 (m, 1H), 0.87–0.82 (m, 1H), 0.00 (s, 9H) ppm;  $M_{\text{n}}(\text{NMR})$  5200 g/mol,  $\text{DP}_{\text{n}}(\text{NMR}, \text{PVL})$  21,  $\text{DP}_{\text{n}}(\text{NMR}, \text{PLLA})$  18,  $M_{\text{n}}(\text{SEC})$  15000 g/mol, PDI 1.14.

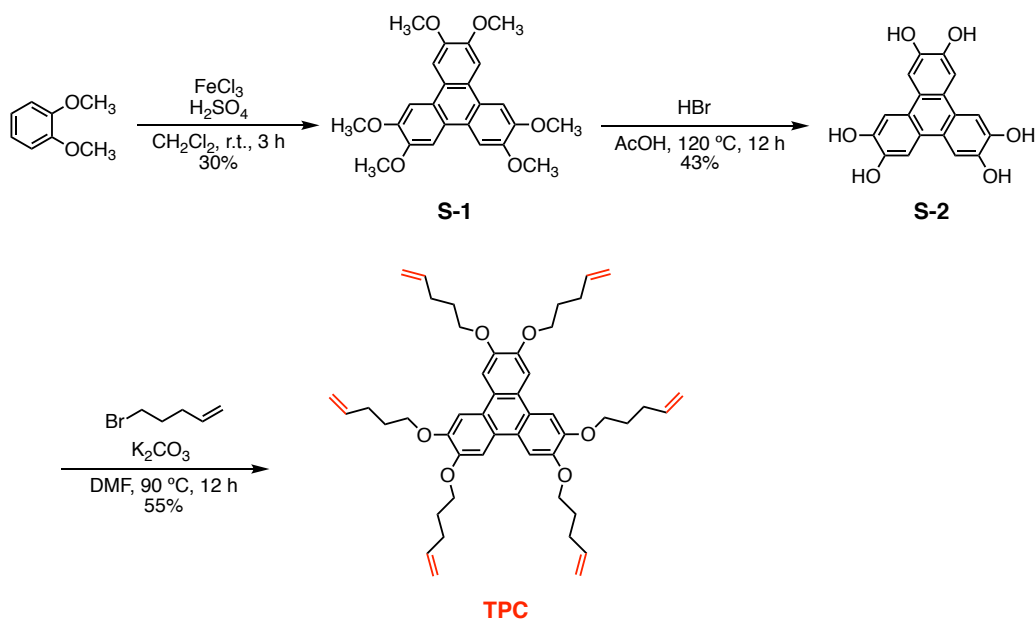

Scheme S14. Synthesis of **TPC**

**TPC** was synthesized according to literature.<sup>S2</sup> **TPC** (1.1 g, 1.4 mmol) was obtained in 7.1 % overall yield (3 steps) as a brown solid; <sup>1</sup>H NMR (500 MHz, 298 K, CDCl<sub>3</sub>)  $\delta$  7.83 (s, 6H), 5.85–5.76 (m, 6H), 5.03–4.93 (m, 12H), 4.25 (d,  $J$  = 6.5 Hz, 12H), 2.40–2.33 (m, 12H), 2.10–2.00 (m, 12H) ppm.

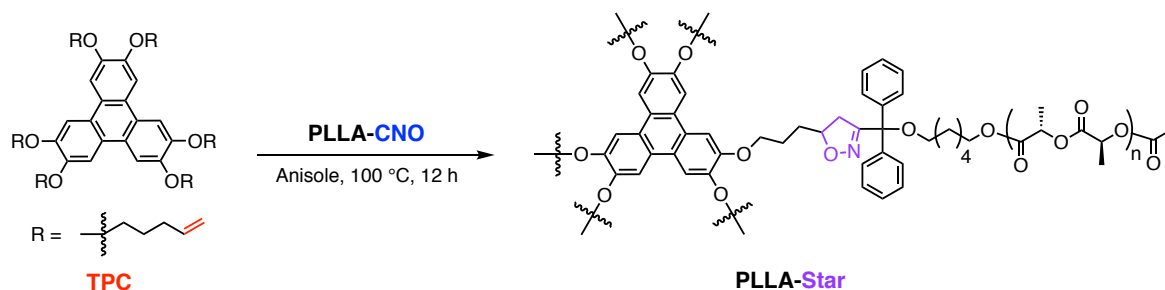

Scheme S15. Synthesis of **PLLA-star**

A solution of **PLLA-CNO** and **TPC** in anisole was stirred at 100 °C for 12 h. The reaction mixture was poured into excess amount of hexane. The crude was purified by preparative GPC, and obtained polymer was precipitated into excess amount of hexane to obtain **PLLA-star** as a white powder; <sup>1</sup>H NMR (500 MHz, 298 K, CDCl<sub>3</sub>)  $\delta$  7.77 (s, 6H), 7.55–7.53 (m, 24H), 7.30–7.23 (m, 36H), 5.22–5.11 (m,  $n \times 12$ H), 4.63–4.59 (m, 6H), 4.15–4.10 (m, 12H), 4.27–4.07 (m, 12H), 3.21–3.17 (m, 12H), 2.91–2.82 (m, 6H), 2.40–2.30 (m, 6H), 2.13 (s, 18H), 2.40–2.33 (m, 12H), 2.10–2.00 (m, 12H), 1.71–1.50 (m,  $n \times 36$ H), 1.67–1.36 (m, 24H), 1.13–1.06 (m, 6H), 0.86–0.80 (m, 6H) ppm; IR (NaCl):  $\nu$  2995, 2943, 2877, 1759, 1517, 1452, 1436, 1382, 1363, 1344, 1309, 1270, 1250, 1213, 1184, 1145, 1097, 1169, 1047, 960, 871, 755, 705 cm<sup>-1</sup>.

**PLLA<sub>20</sub>-star** (run 1 in Table 3)

**PLLA<sub>20</sub>-CNO** (0.33 g, 0.10 mmol), **TPC** (7.3 mg, 10  $\mu$ mol) and anisole (10 mL) were used for reaction. The conversion was >99% determined by <sup>1</sup>H NMR. After the purification, the precipitate was dried to give **PLLA<sub>20</sub>-star** in 61% yield (0.13 g);  $M_{n(SEC)}$  23600 g/mol, PDI 1.07;  $T_g$  44.1 °C;  $T_m$  138 °C;  $T_{d5}$  283 °C.

**PLLA<sub>51</sub>-star** (run 2 in Table 3)

**PLLA<sub>51</sub>-CNO** (0.77 g, 0.10 mmol), **TPC** (7.3 mg, 10  $\mu$ mol) and anisole (10 mL) were used for reaction. The conversion was >99% determined by <sup>1</sup>H NMR. After the purification, the precipitate was dried to give **PLLA<sub>51</sub>-star** in 65% yield (0.31 g);  $M_{n(SEC)}$  58800 g/mol, PDI 1.07;  $T_g$  51.2 °C;  $T_m$  142 °C;  $T_{d5}$  311 °C.

**PLLA<sub>98</sub>-star** (run 3 in Table 3)

**PLLA<sub>98</sub>-CNO** (0.72 g, 0.05 mmol), **TPC** (3.7 mg, 5.0  $\mu$ mol) and anisole (5.0 mL) were used for reaction. The conversion was >99% determined by <sup>1</sup>H NMR. After the purification, the precipitate was dried to give **PLLA<sub>98</sub>-star** in 60% yield (0.26 g);  $M_{n(SEC)}$  99600 g/mol, PDI 1.05;  $T_g$  54.2 °C;  $T_{d5}$  331 °C.

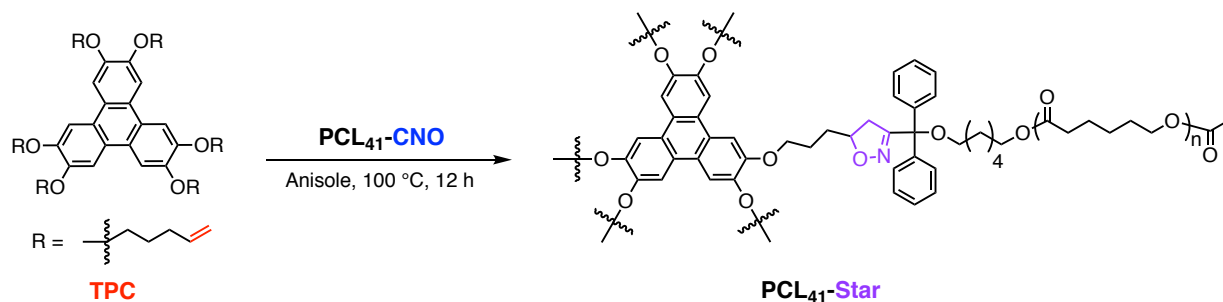

Scheme S16. Synthesis of **PCL<sub>41</sub>-star**

A solution of **PCL<sub>41</sub>-CNO** and **TPC** in anisole was stirred at 100 °C for 12 h. The reaction mixture was poured into excess amount of hexane. The crude was purified by preparative GPC, and obtained polymer was precipitated into excess amount of hexane to obtain **PCL<sub>41</sub>-star** as a white powder; <sup>1</sup>H NMR (500 MHz, 298 K, CDCl<sub>3</sub>)  $\delta$  7.77 (s, 6H), 7.54–7.53 (m, 24H), 7.30–7.23 (m, 36H), 4.63–4.59 (m, 6H), 4.15–4.10 (m, 12H), 4.11–4.05 (m,  $n \times 12H$ ), 4.27–4.07 (m, 12H), 3.21–3.17 (m, 12H), 2.91–2.82 (m, 6H), 2.49–2.35 (m,  $n \times 12H$ ), 2.40–2.30 (m, 6H), 2.04 (s, 18H), 2.40–2.33 (m, 12H), 2.10–2.00 (m, 12H), 1.73–1.65 (m,  $n \times 4H$ ), 1.67–1.36 (m, 24H), 1.40–1.32 (m,  $n \times 12H$ ), 1.67–1.3 (m, 6H), 0.86–0.80 (m, 6H) ppm; IR (NaCl):  $\nu$  2943, 2910, 2864, 1725, 1517, 1470, 1437, 1420, 1398, 1367, 1294, 1254, 1187, 1114, 1065, 1048, 959, 935, 754, 704 cm<sup>-1</sup>.

### PCL<sub>41</sub>-star (run 4 in Table 3)

PCL<sub>41</sub>-CNO (0.51 g, 0.10 mmol), TPC (7.3 mg, 10  $\mu$ mol) and anisole (10 mL) were used for reaction. The conversion was >99% determined by <sup>1</sup>H NMR. After the purification, the precipitate was dried to give PCL<sub>41</sub>-star in 70% yield (0.22 g);  $M_n$ (SEC) 43700 g/mol, PDI 1.06;  $T_m$  48.1  $^{\circ}$ C;  $T_{d5}$  322  $^{\circ}$ C.

### PCL<sub>41</sub>-star (run 5 in Table 3)

The reaction was carried out for 1 h. The conversion was 45% determined by <sup>1</sup>H NMR.

### PCL<sub>41</sub>-star (Solvent-free reaction, run 6 in Table 3)

PCL<sub>41</sub>-CNO (0.51 g, 0.10 mmol) and TPC (7.3 mg, 10  $\mu$ mol) were heated at 100  $^{\circ}$ C for 1 h. The conversion was >99% determined by <sup>1</sup>H NMR.

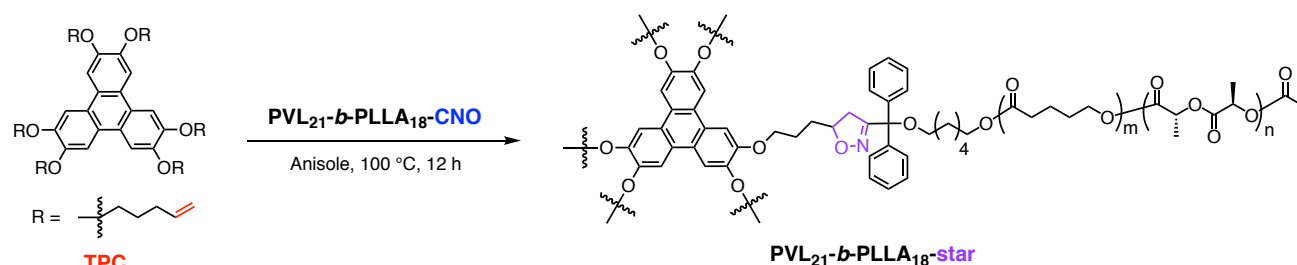

Scheme S17. Synthesis of PVL<sub>21</sub>-b-PLLA<sub>18</sub>-star (run 7 in Table 3)

A solution of PVL<sub>21</sub>-b-PLLA<sub>18</sub>-CNO (0.51 g, 0.10 mmol) and TPC (7.3 mg, 0.01 mmol) in anisole (10 mL) was stirred at 100  $^{\circ}$ C for 12 h. The reaction mixture was poured into excess amount of hexane. The crude was purified by preparative GPC, and obtained polymer was precipitated into excess amount of hexane to obtain PVL<sub>21</sub>-b-PLLA<sub>18</sub>-star (0.17 g) in 54% yield as a white powder; <sup>1</sup>H NMR (500 MHz, 298 K, CDCl<sub>3</sub>)  $\delta$  7.77 (s, 6H), 7.54–7.53 (m, 24H), 7.30–7.23 (m, 36H), 5.22–5.11 (m,  $n \times 12$ H), 4.63–4.59 (m, 6H), 4.15–4.10 (m, 12H), 4.10–4.05 (m,  $n \times 12$ H), 4.27–4.07 (m, 12H), 3.21–3.17 (m, 12H), 2.91–2.82 (m, 6H), 2.48–2.30 (m,  $n \times 12$ H), 2.40–2.30 (m, 6H), 2.13 (s, 18H), 2.40–2.33 (m, 12H), 2.10–2.00 (m, 12H), 1.73–1.65 (m,  $n \times 4$ H), 1.71–1.50 (m,  $n \times 36$ H), 1.67–1.36 (m, 24H), 1.41–1.32 (m,  $n \times 12$ H), 1.13–1.06 (m, 6H), 0.86–0.80 (m, 6H) ppm; IR (NaCl):  $\nu$  2996, 2943, 2897, 1759, 1734, 1517, 1455, 1436, 1420, 1385, 1350, 1316, 1288, 1251, 1213, 1185, 1169, 1132, 1094, 1052, 961, 872, 755, 705  $\text{cm}^{-1}$ ;  $M_n$ (SEC) 55900 g/mol, PDI 1.04;  $T_m$  137  $^{\circ}$ C;  $T_{d5}$  298  $^{\circ}$ C.

## 2. Spectrum data of new compounds

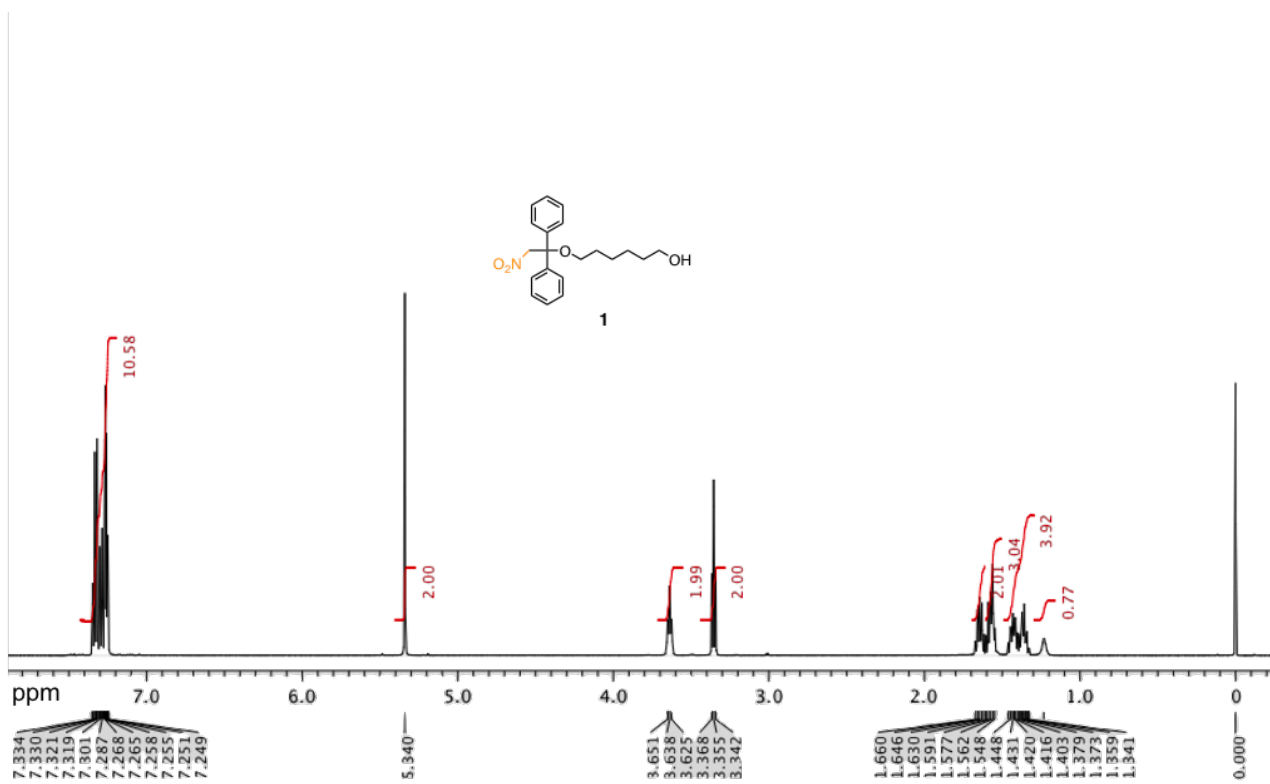

**Figure S1.** <sup>1</sup>H NMR spectrum of **1** (500 MHz, 298 K, CDCl<sub>3</sub>)

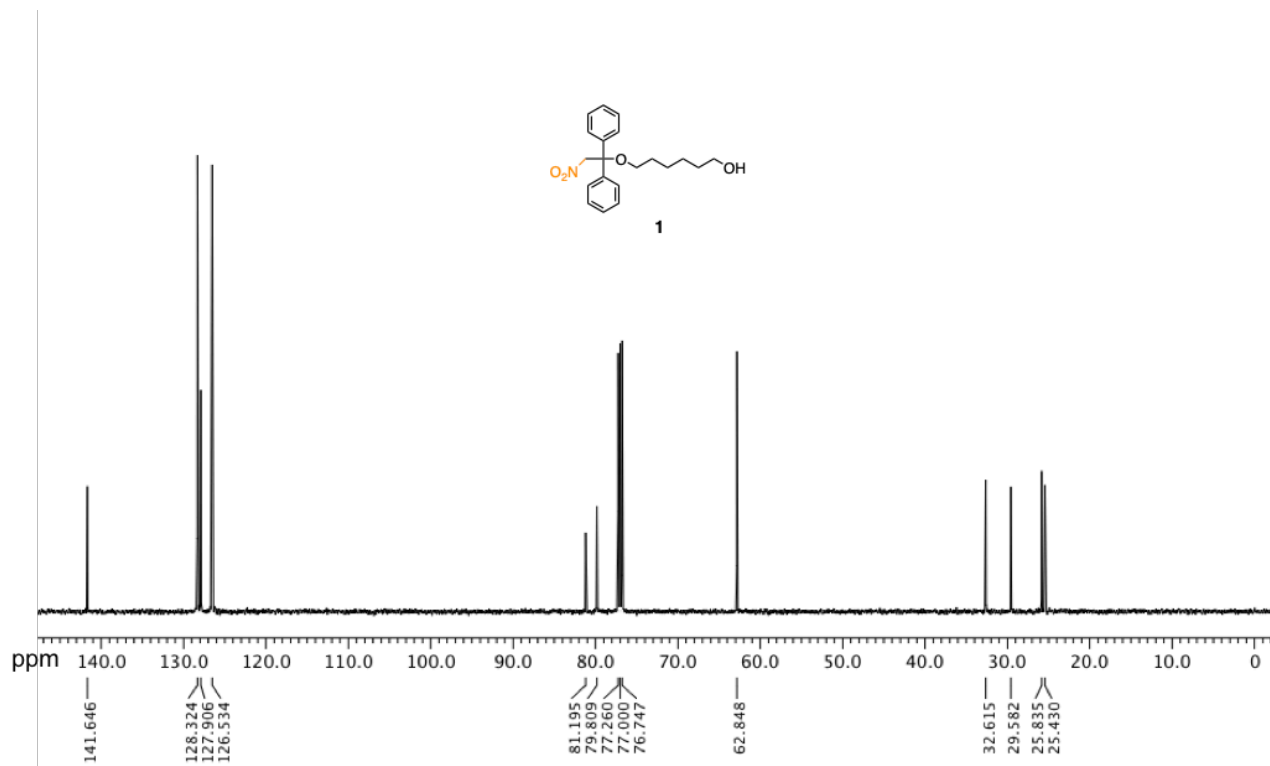

**Figure S2.** <sup>13</sup>C NMR spectrum of **1** (125 MHz, 298 K, CDCl<sub>3</sub>)

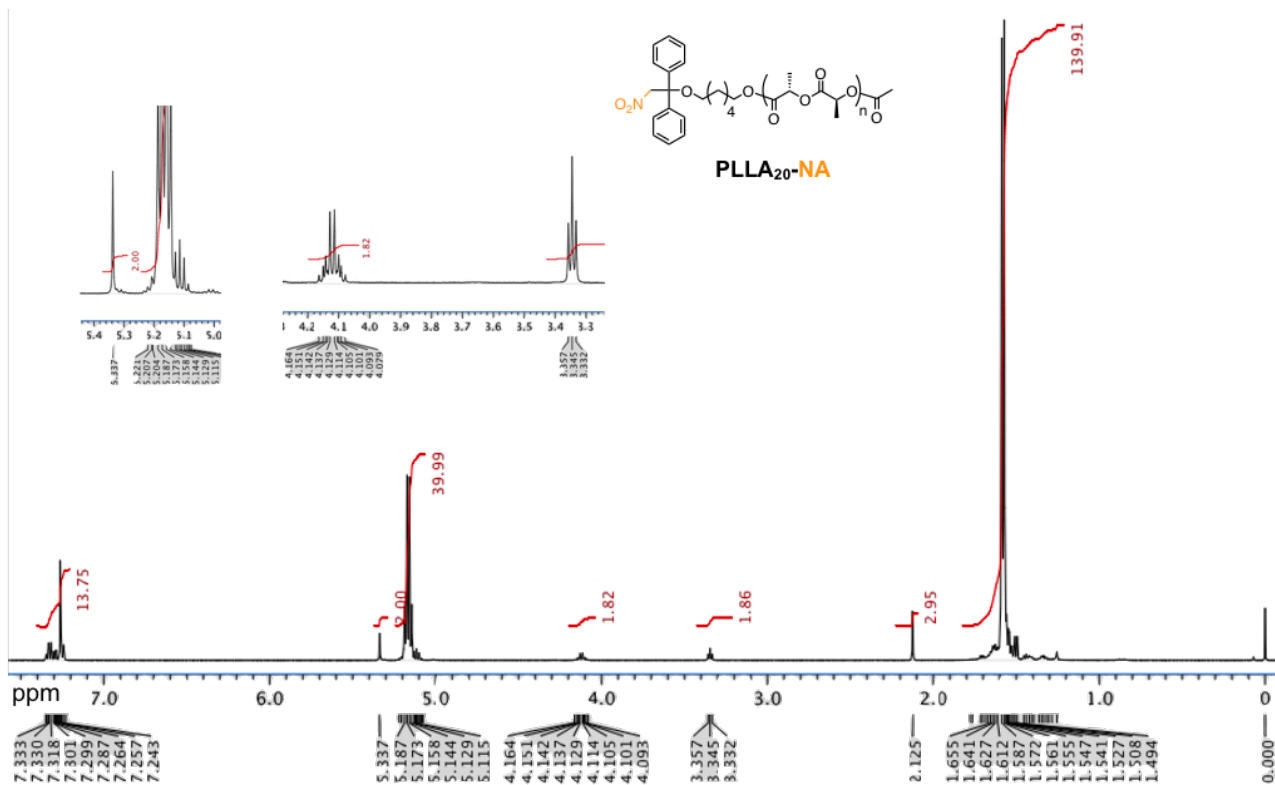

Figure S3.  $^1H$  NMR spectrum of PLLA<sub>20</sub>-NA (500 MHz, 298 K, CDCl<sub>3</sub>)

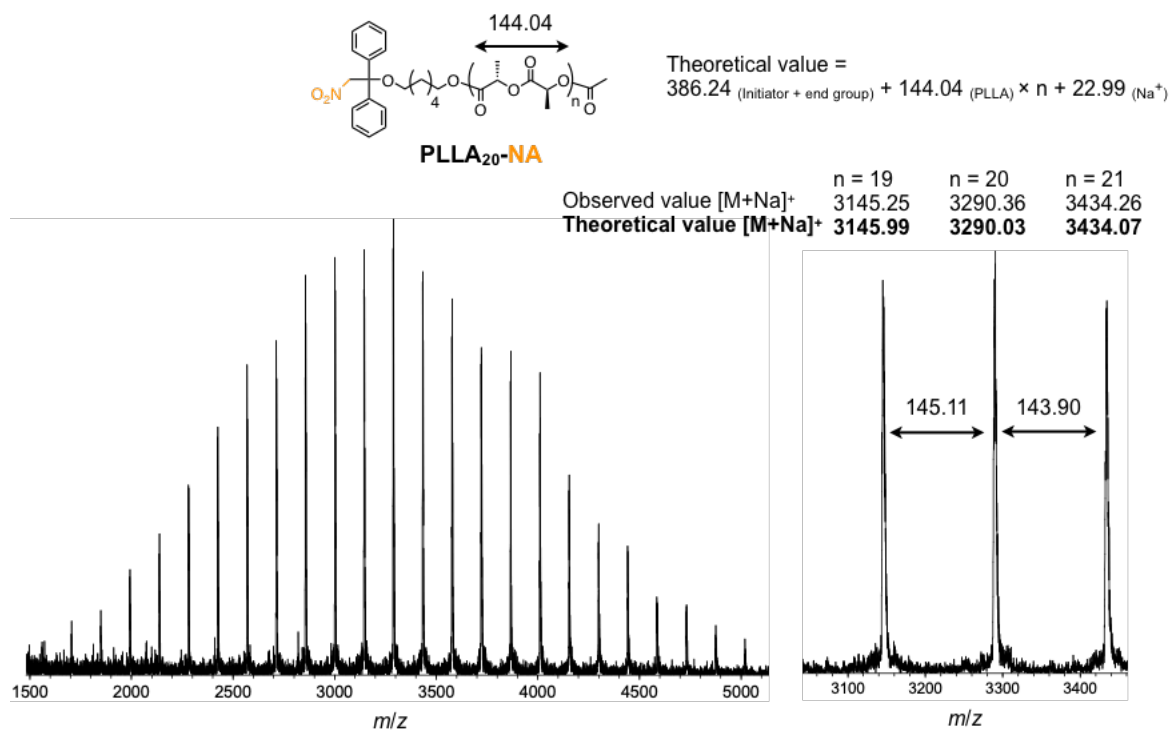

Figure S4. MALDI-TOF MS spectrum of PLLA<sub>20</sub>-NA (marix: dithranol)

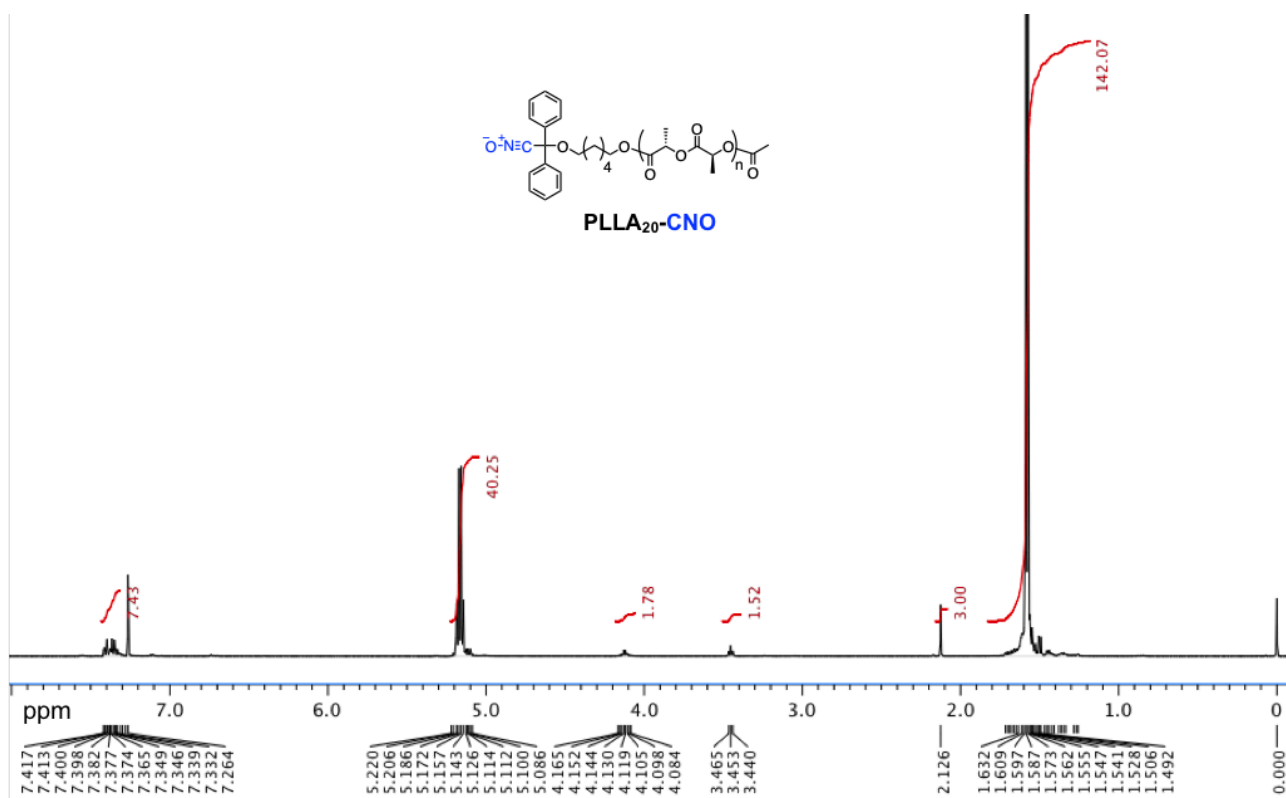

Figure S5.  $^1\text{H}$  NMR spectrum of PLLA<sub>20</sub>-CNO (500 MHz, 298 K,  $\text{CDCl}_3$ )

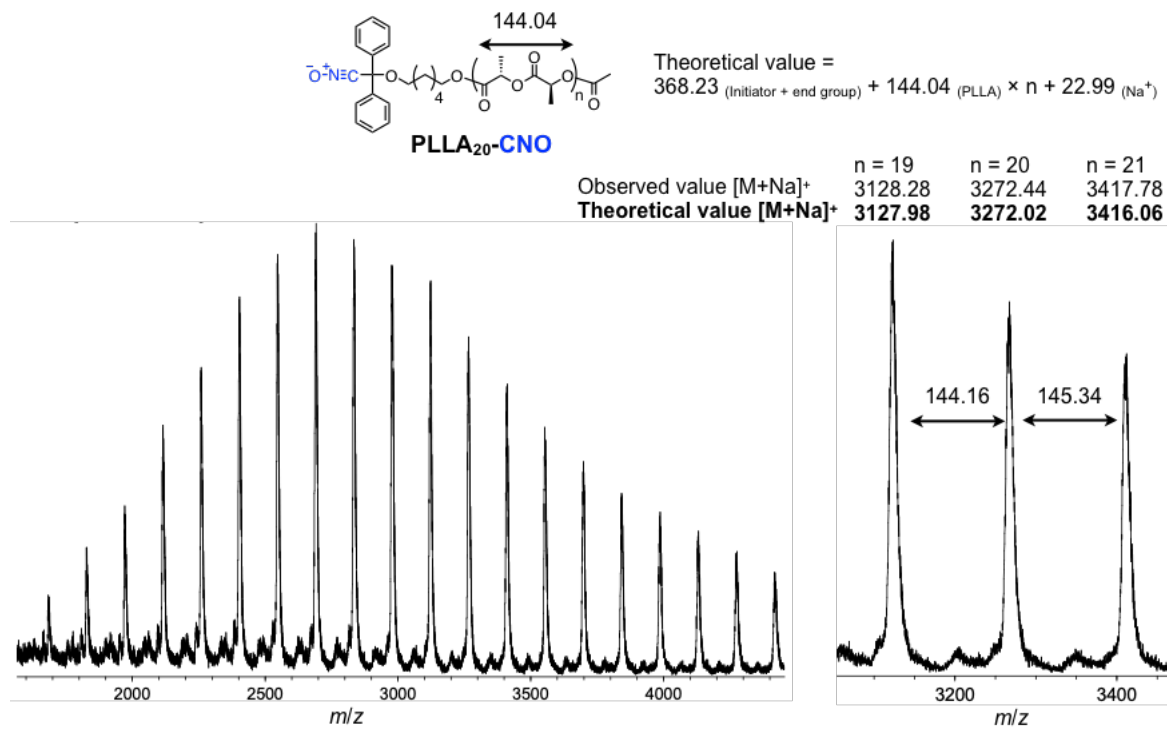

Figure S6. MALDI-TOF MS spectrum of PLLA<sub>20</sub>-CNO (matrix: dithranol)



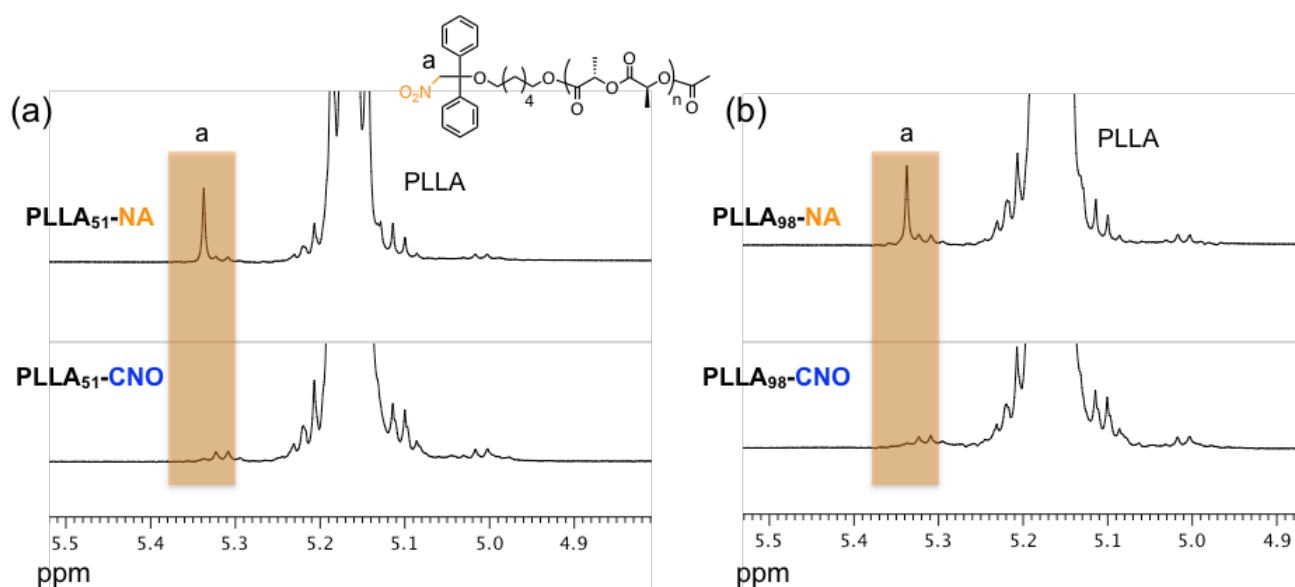

**Figure S7.** Partial  $^1\text{H}$  NMR spectra of (a) **PLLA<sub>51</sub>-NA**, **PLLA<sub>51</sub>-CNO** and (b) **PLLA<sub>98</sub>-NA**, **PLLA<sub>98</sub>-CNO** (500 MHz, 298 K,  $\text{CDCl}_3$ )

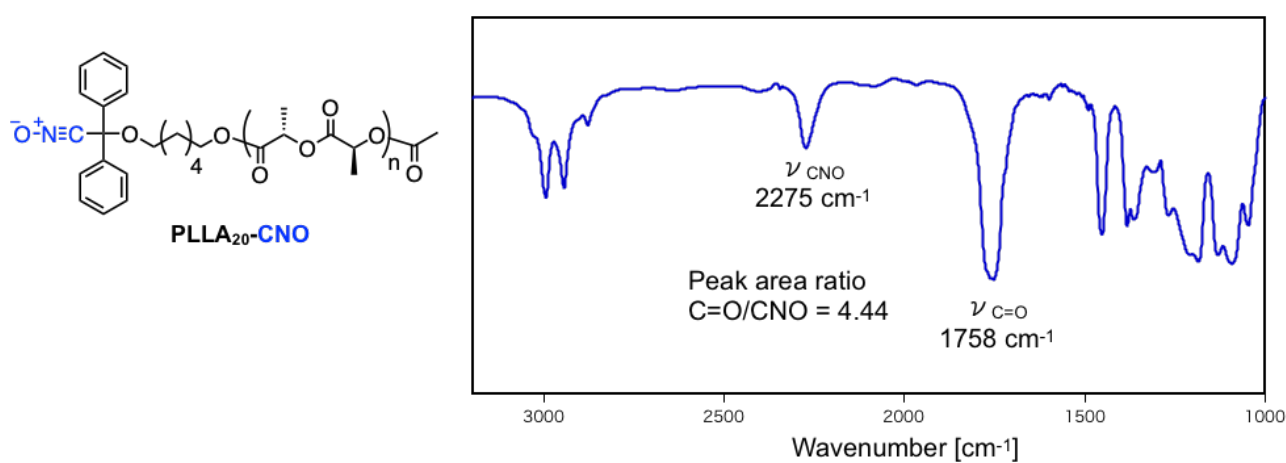

**PLLA<sub>20</sub>-CNO** (20 mer) :  $\text{C=O/CNO} = 4.44$ , conversion ( $^1\text{H}$  NMR) : >99%

When the conversion of nitroalkane is >99%, the peak area ratio of **PLLA<sub>51</sub>-CNO** and **PLLA<sub>98</sub>-CNO** (theoretical) are assessed as below;

**PLLA<sub>51</sub>-CNO** (51 mer) :  $\text{C=C/CNO} = 11.32$

**PLLA<sub>98</sub>-CNO** (98 mer) :  $\text{C=C/CNO} = 21.75$

**Figure S8.** FT-IR spectrum of **PLLA<sub>20</sub>-CNO** (NaCl)

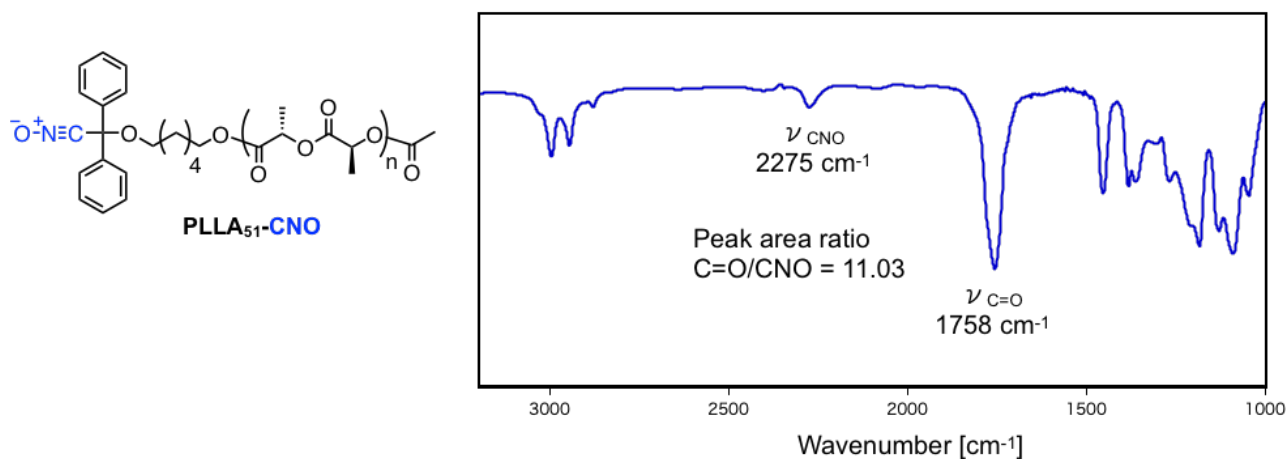

Peak area ratio  
 Theoretical value : C=C/CNO = 11.32  
 Observed value : C=O/CNO = 11.03

**Conversion (IR) =  $11.03/11.32 \times 100 = 97\%$**

**Figure S9.** FT-IR spectrum of PLLA<sub>51</sub>-CNO (NaCl)

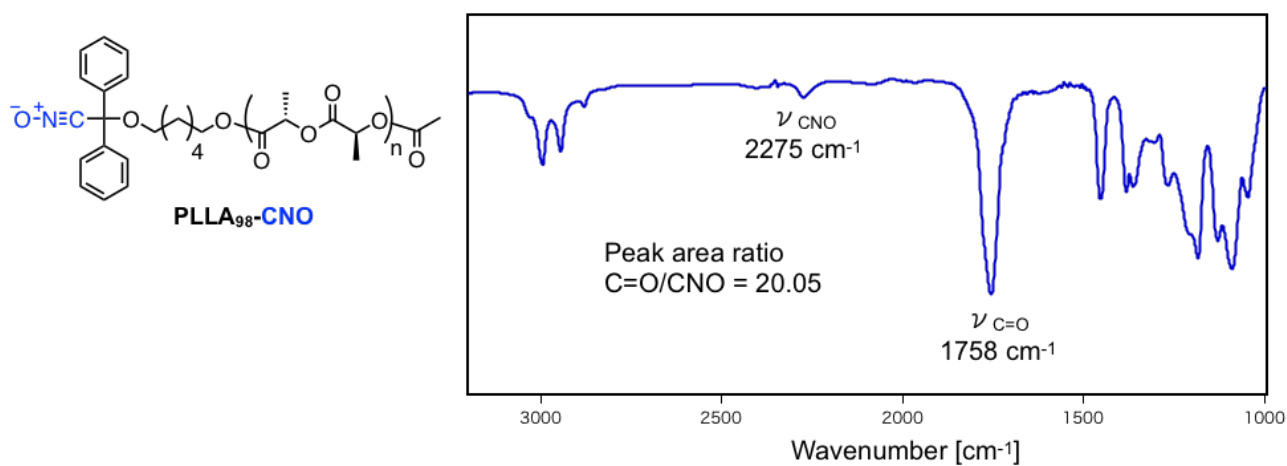

Peak area ratio  
 Theoretical value : C=C/CNO = 21.75  
 Observed value : C=O/CNO = 20.67

**Conversion (IR) =  $20.05/21.75 \times 100 = 95\%$**

**Figure S10.** FT-IR spectrum of PLLA<sub>98</sub>-CNO (NaCl)

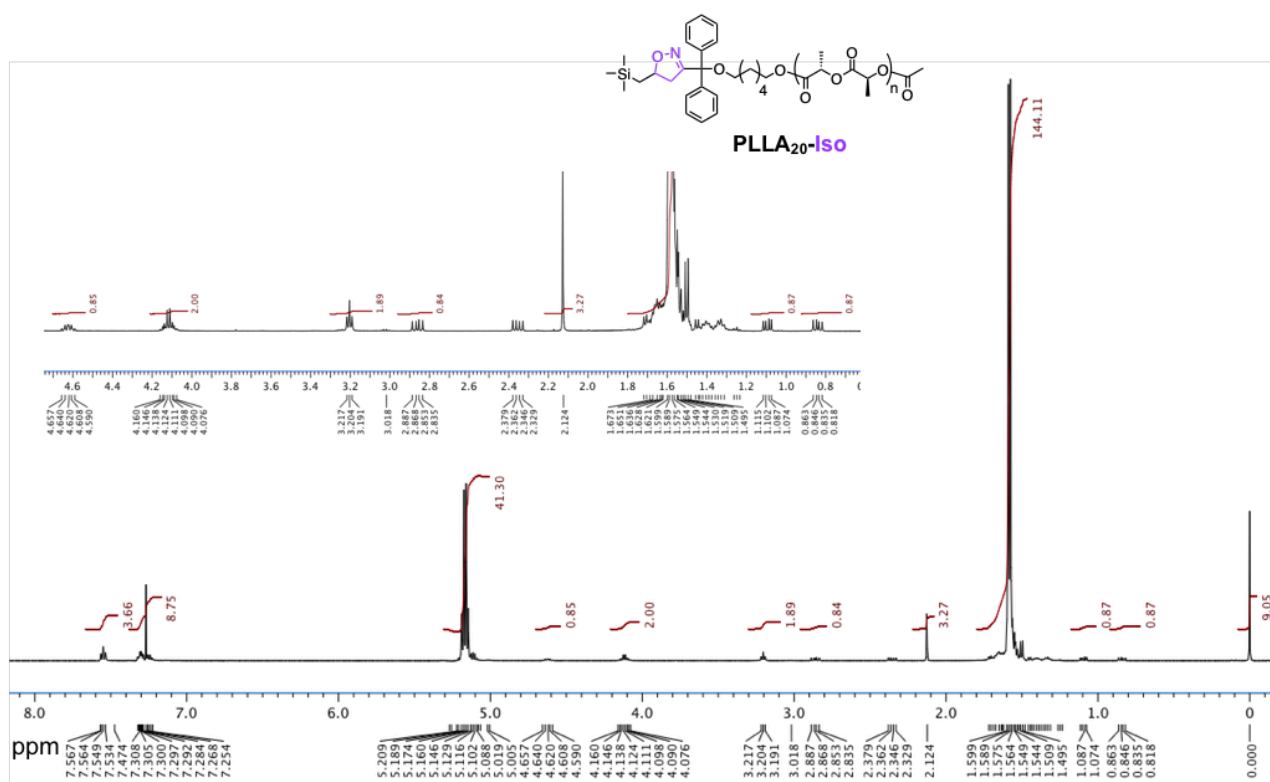

**Figure S11.**  $^1\text{H}$  NMR spectrum of **PLLA<sub>20</sub>-Iso** (500 MHz, 298 K,  $\text{CDCl}_3$ )

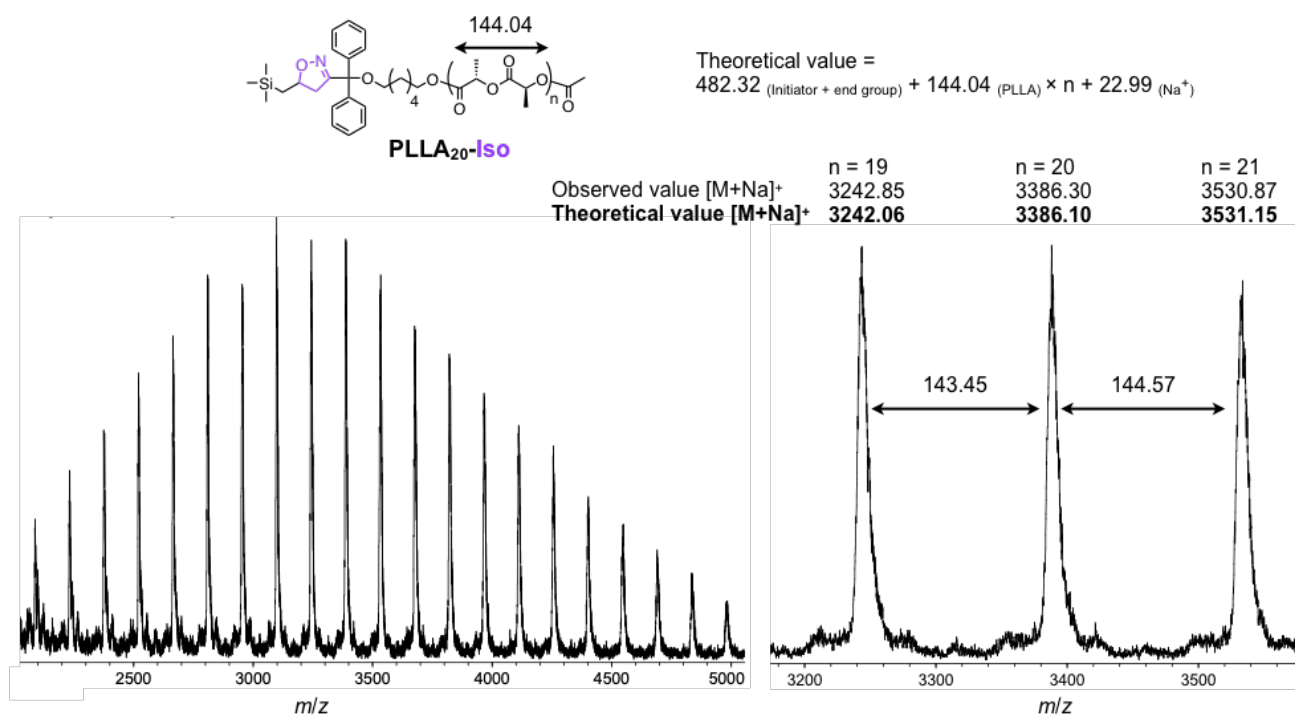

**Figure S12.** MALDI-TOF MS spectrum of **PLLA<sub>20</sub>-Iso** (marix: dithranol)



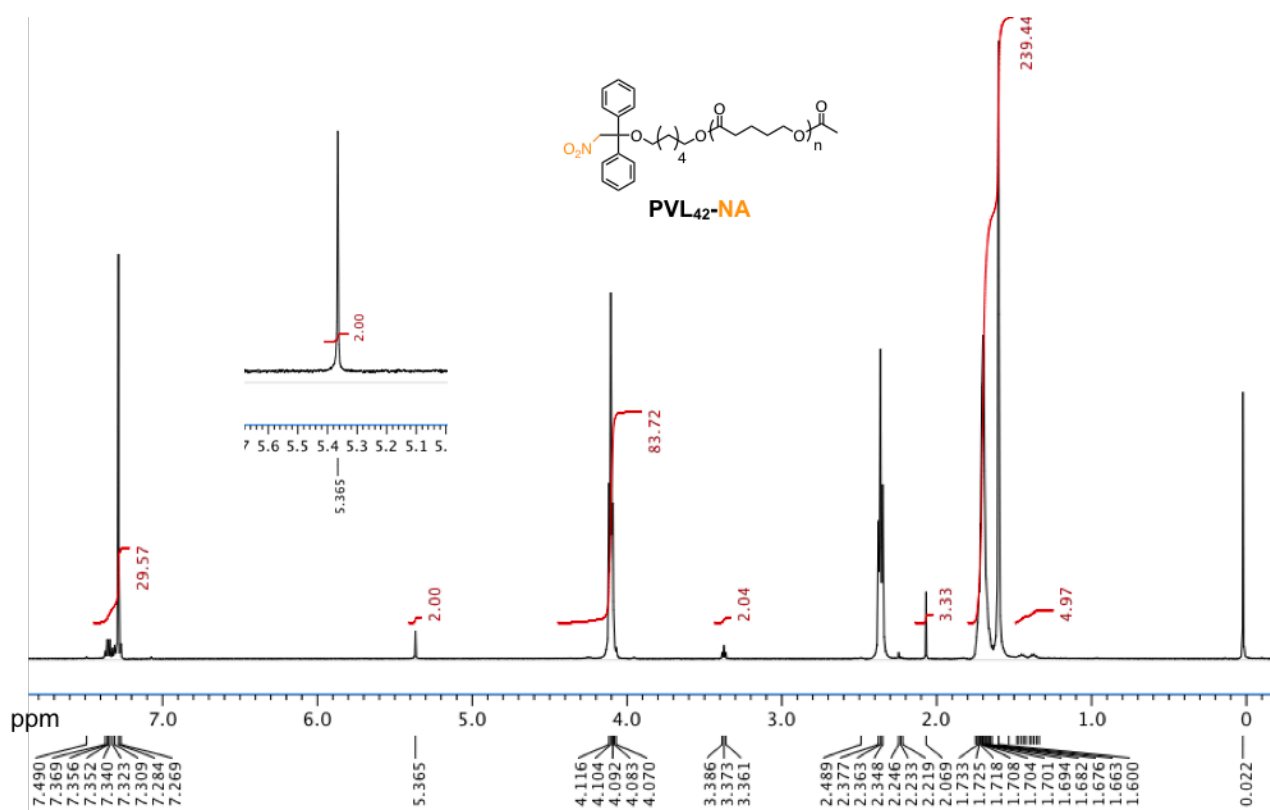

**Figure S15.**  $^1\text{H}$  NMR spectrum of PVL<sub>42</sub>-NA (500 MHz, 298 K,  $\text{CDCl}_3$ )

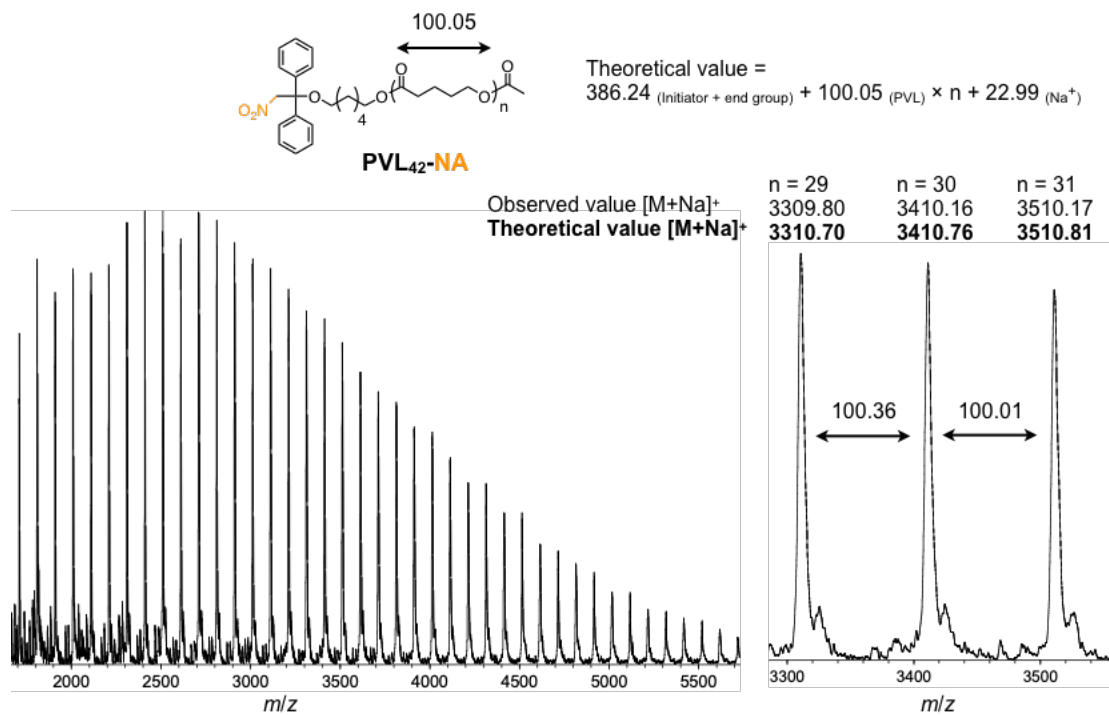

**Figure S16.** MALDI-TOF MS spectrum of PVL<sub>42</sub>-NA (marix: dithranol)

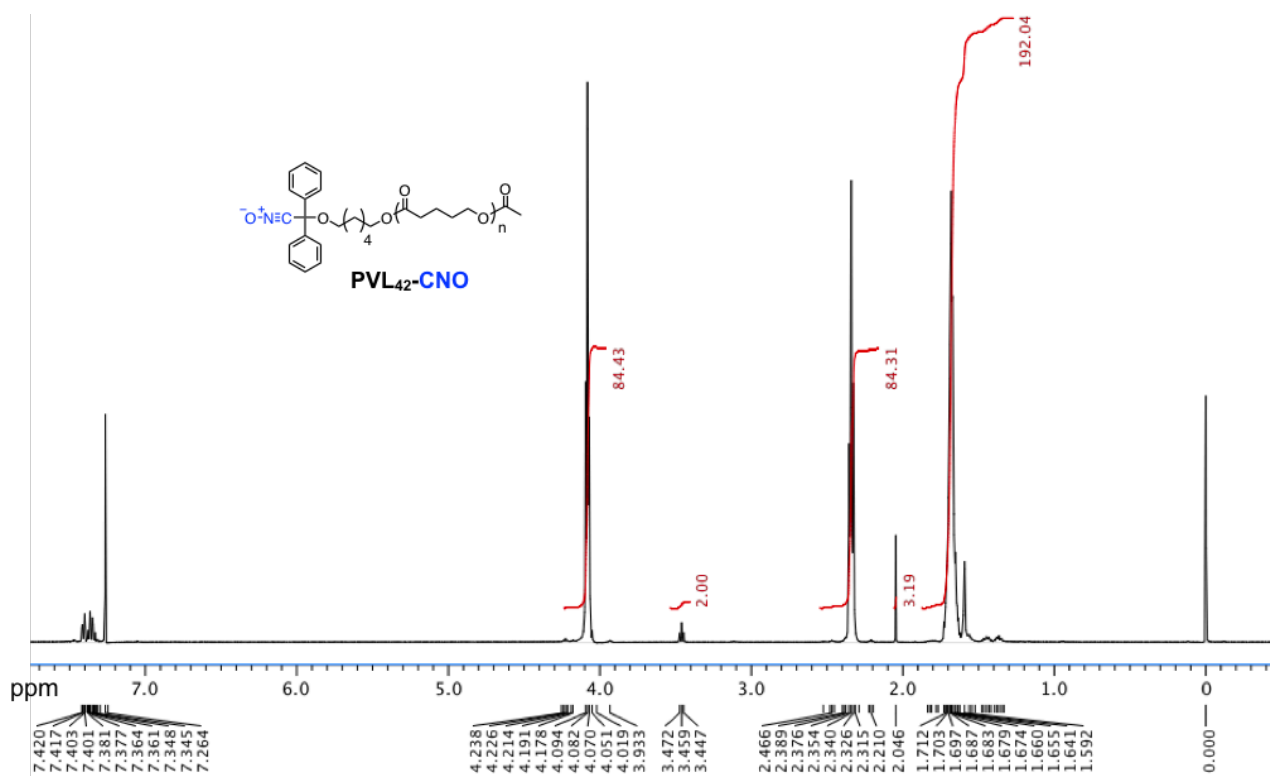

**Figure S17.**  $^1\text{H}$  NMR spectrum of **PVL<sub>42</sub>-CNO** (500 MHz, 298 K,  $\text{CDCl}_3$ )

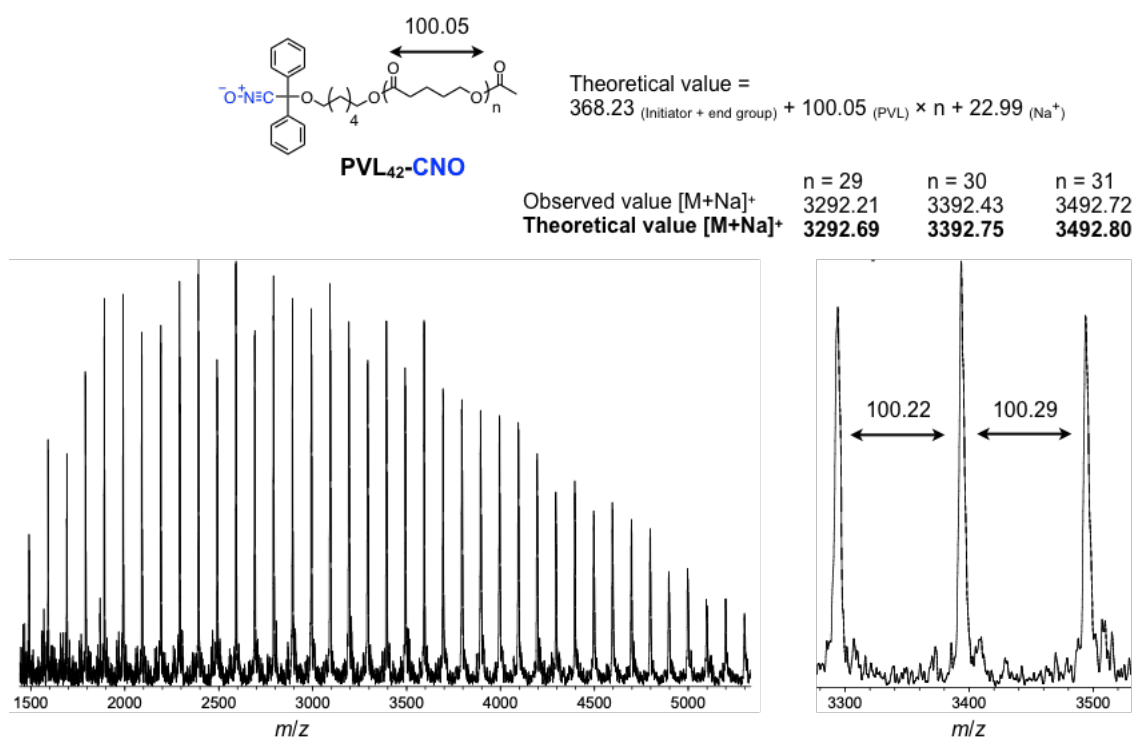

**Figure S18.** MALDI-TOF MS spectrum of **PVL<sub>42</sub>-CNO** (marix: dithranol)

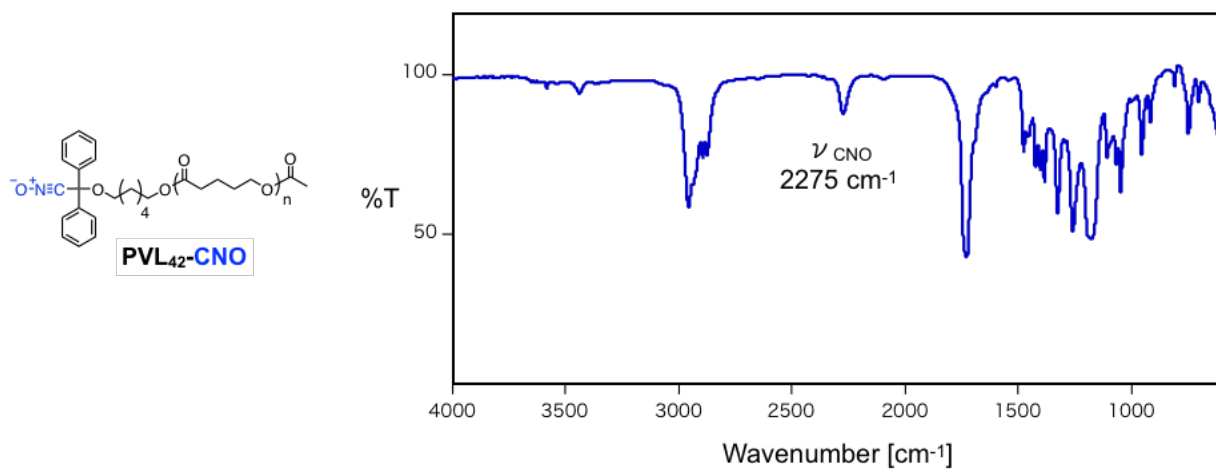

**Figure S19.** FT-IR spectrum of PVL<sub>42</sub>-CNO (NaCl)

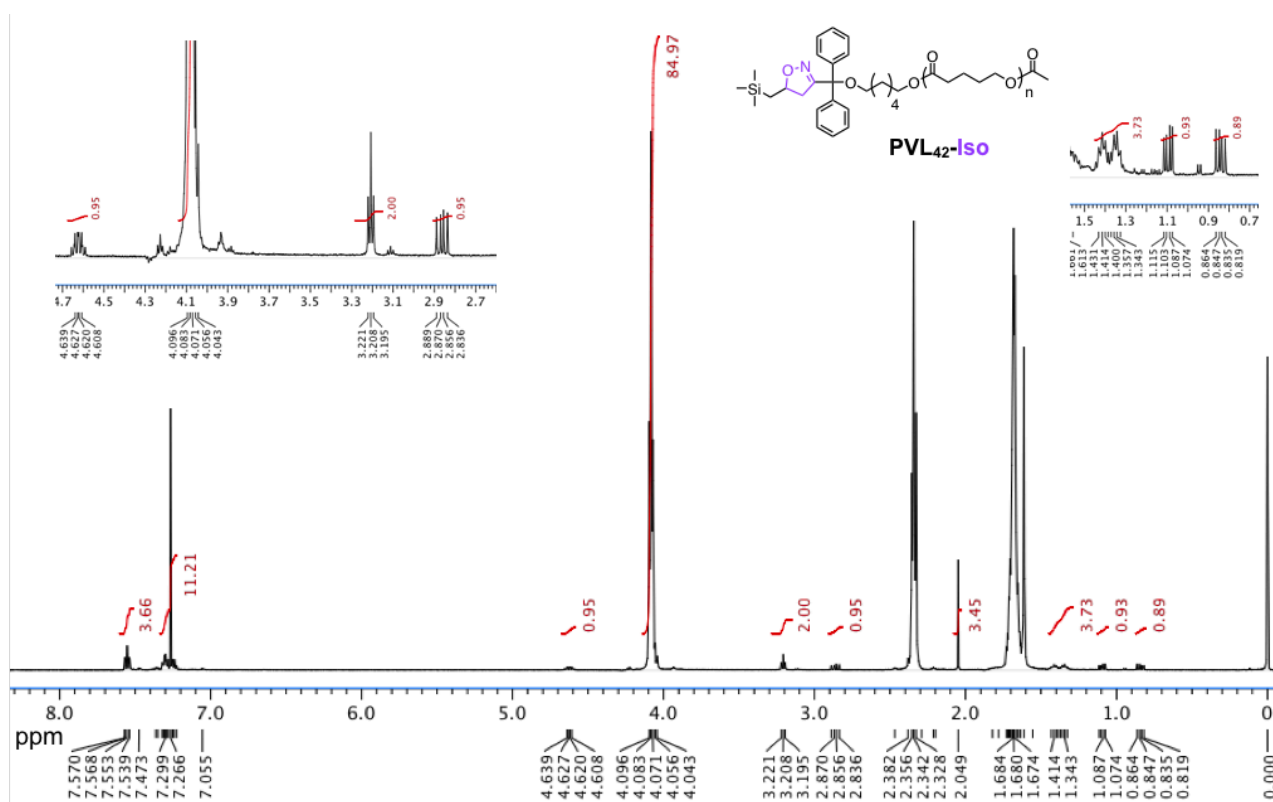

**Figure S20.** <sup>1</sup>H NMR spectrum of PVL<sub>42</sub>-Iso (500 MHz, 298 K, CDCl<sub>3</sub>)

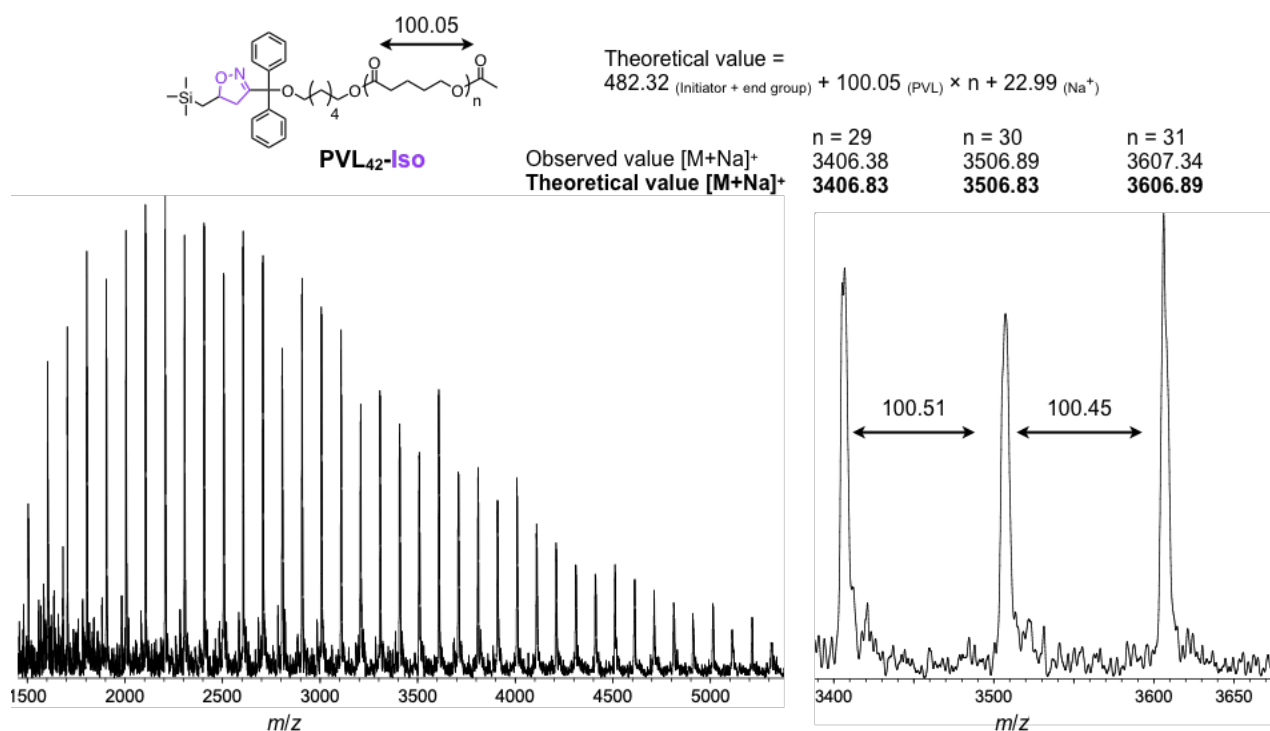

**Figure S21.** MALDI-TOF MS spectrum of **PVL<sub>42</sub>-Iso** (marix: dithranol)

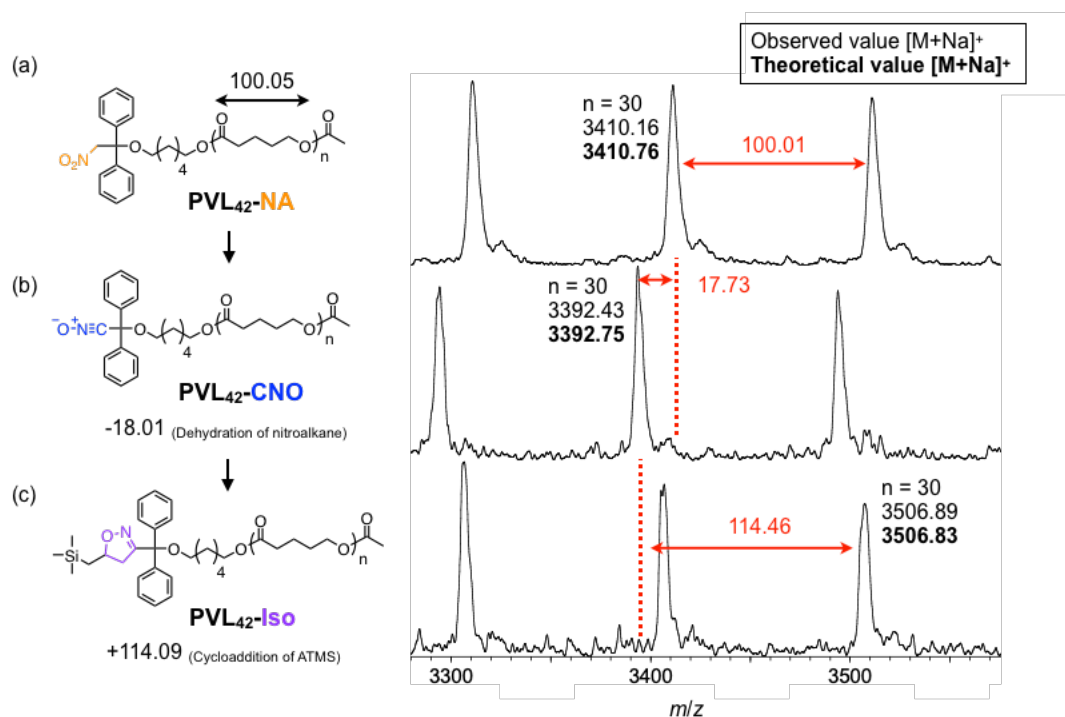

**Figure S22.** MALDI-TOF MS spectra change of (a) **PVL<sub>42</sub>-NA**, (b) **PVL<sub>42</sub>-CNO** and (c) **PVL<sub>42</sub>-Iso** (matrix: dithranol)



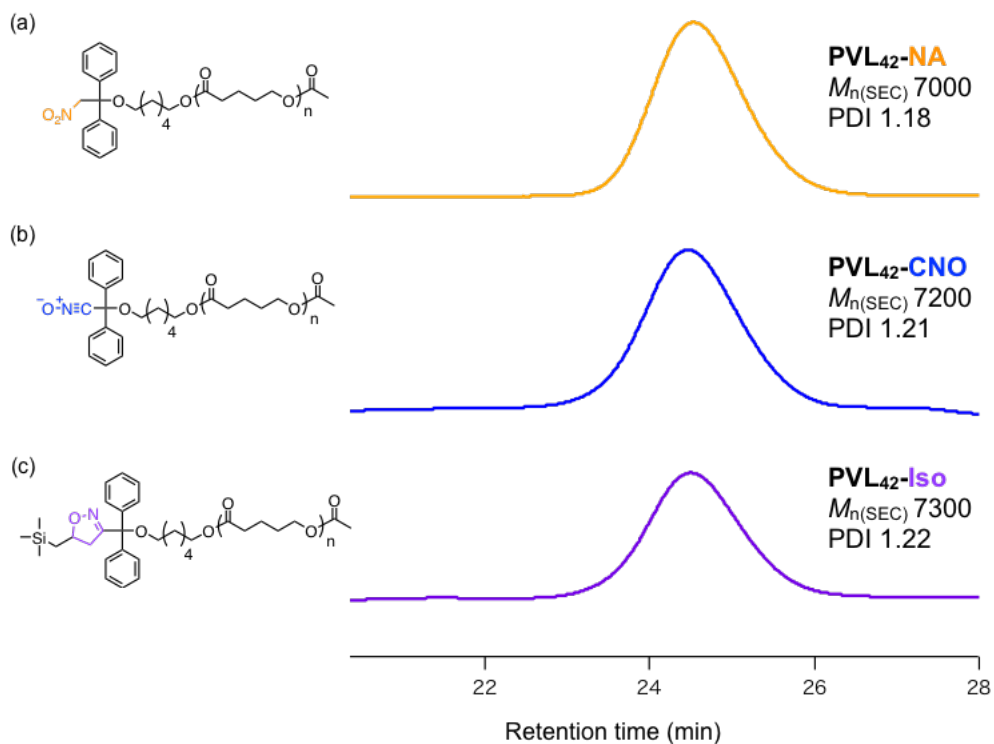

**Figure S23.** SEC charts of (a) **PVL<sub>42</sub>-NA**, (b) **PVL<sub>42</sub>-CNO** and (c) **PVL<sub>42</sub>-Iso** (PS standard, eluent, CHCl<sub>3</sub>; flow rate, 0.85 mL/min, detected by RI)

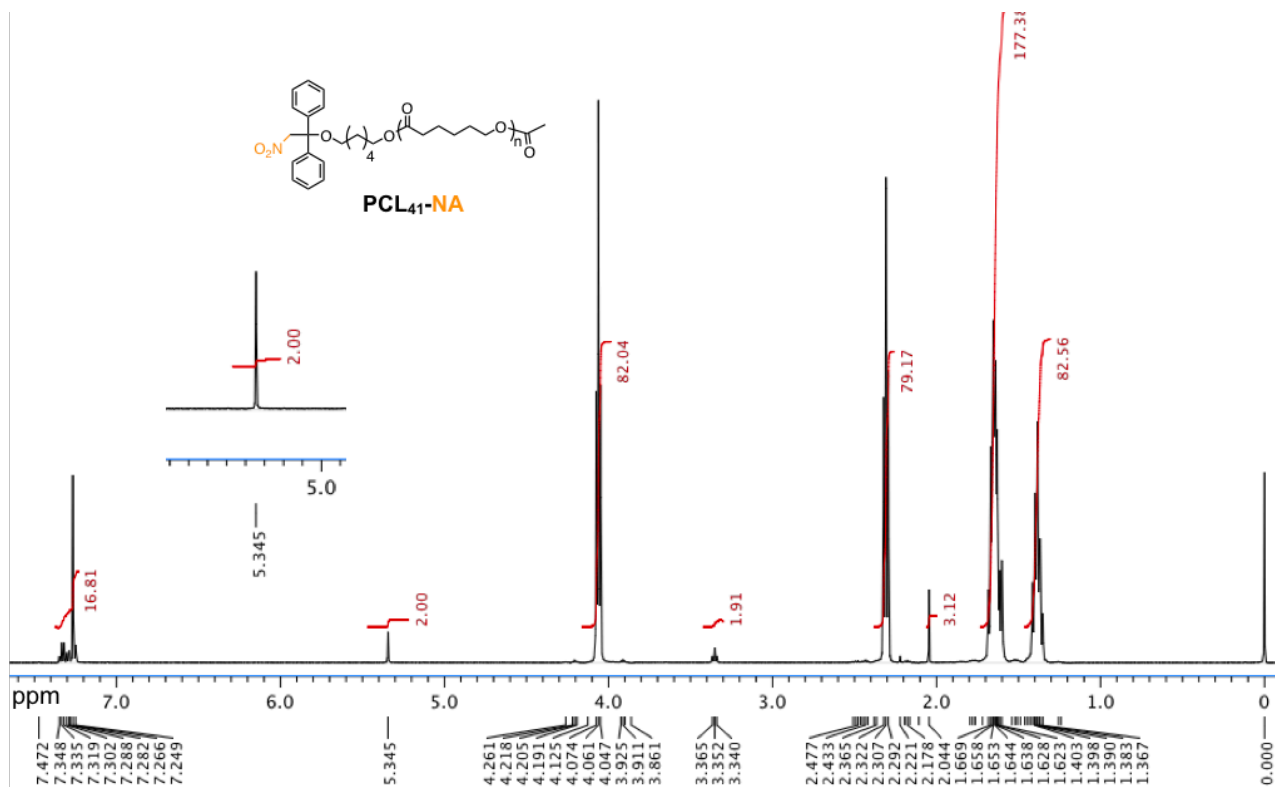

**Figure S24.** <sup>1</sup>H NMR spectrum of **PCL<sub>41</sub>-NA** (500 MHz, 298 K, CDCl<sub>3</sub>)

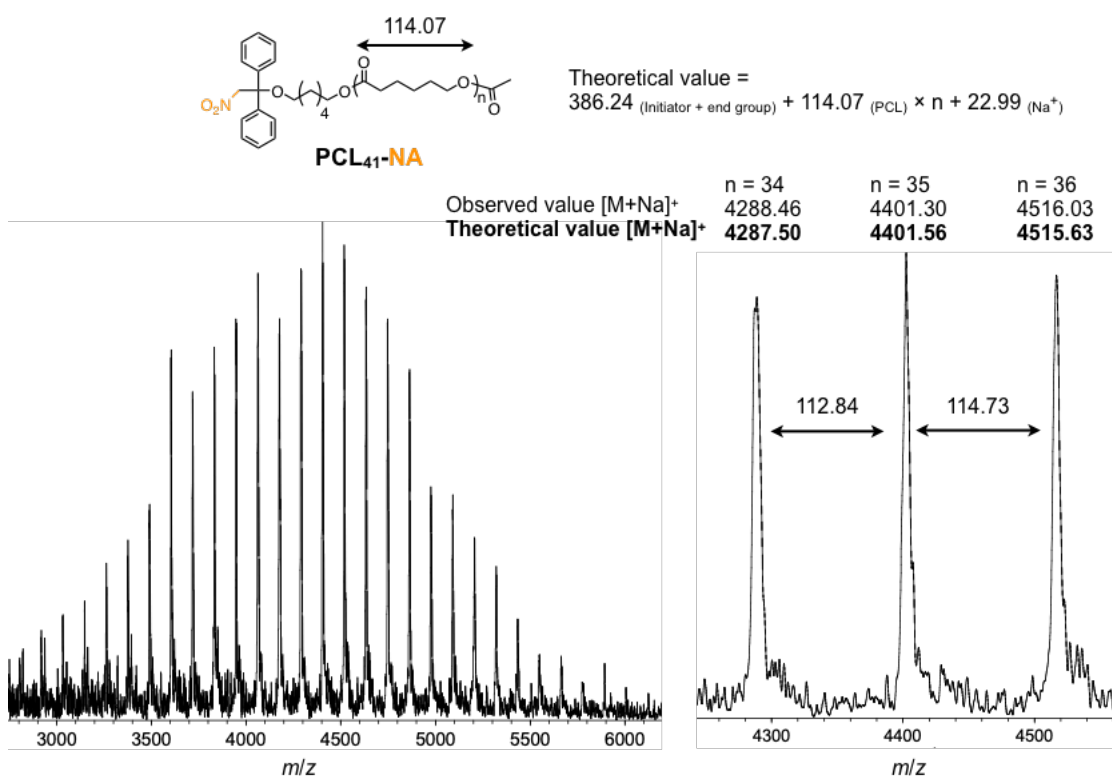

**Figure S25.** MALDI-TOF MS spectrum of **PCL<sub>41</sub>-NA** (marix: dithranol)

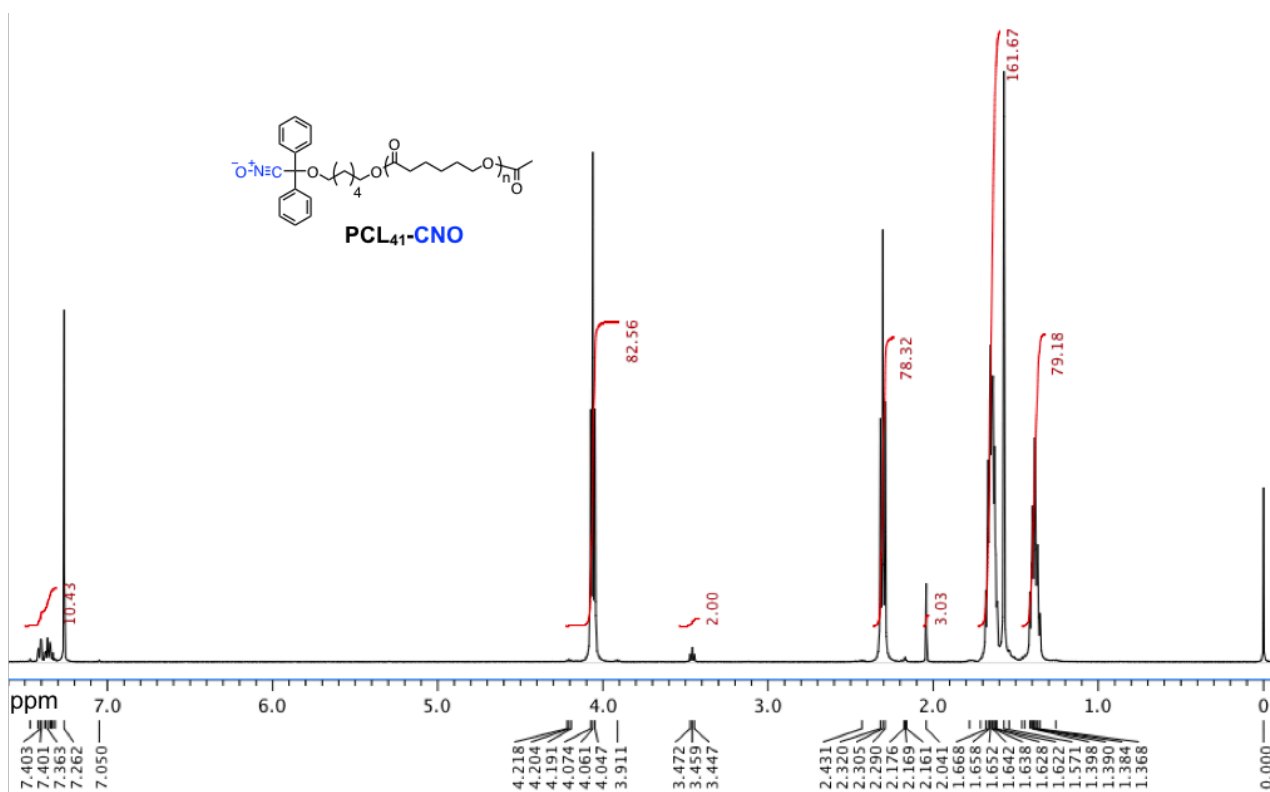

**Figure S26.** <sup>1</sup>H NMR spectrum of **PCL<sub>41</sub>-CNO** (500 MHz, 298 K, CDCl<sub>3</sub>)

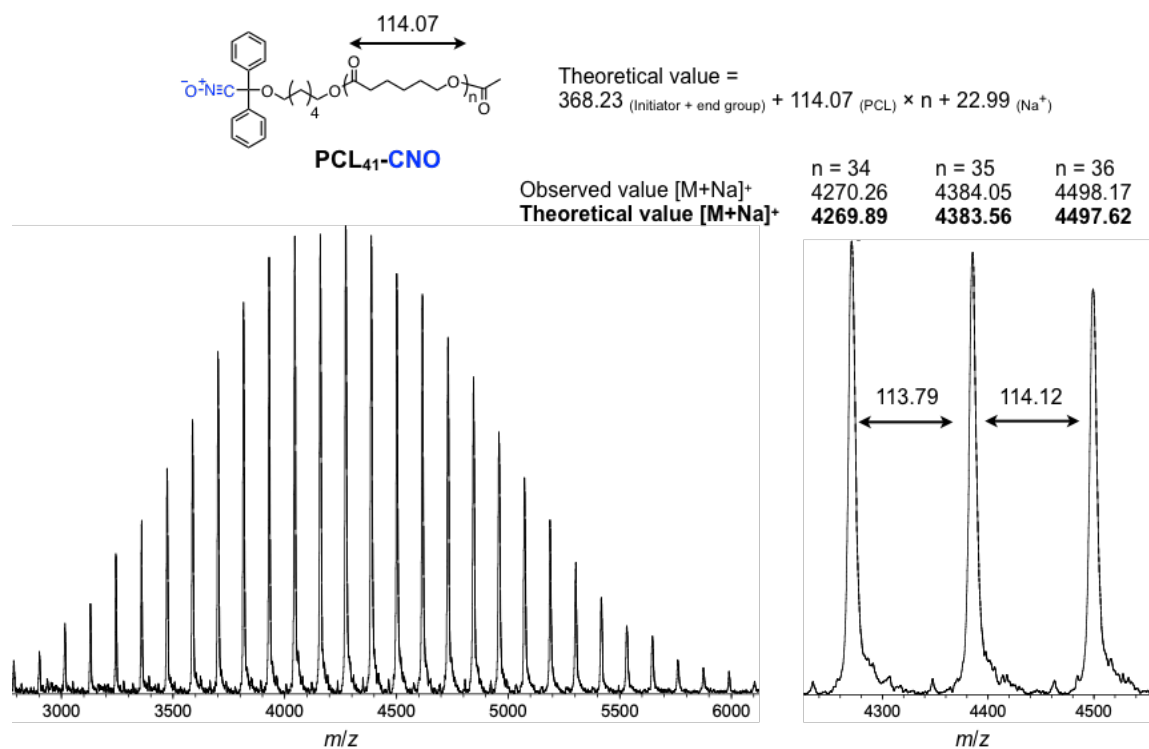

**Figure S27.** MALDI-TOF MS spectrum of **PCL<sub>41</sub>-CNO** (marix: dithranol)

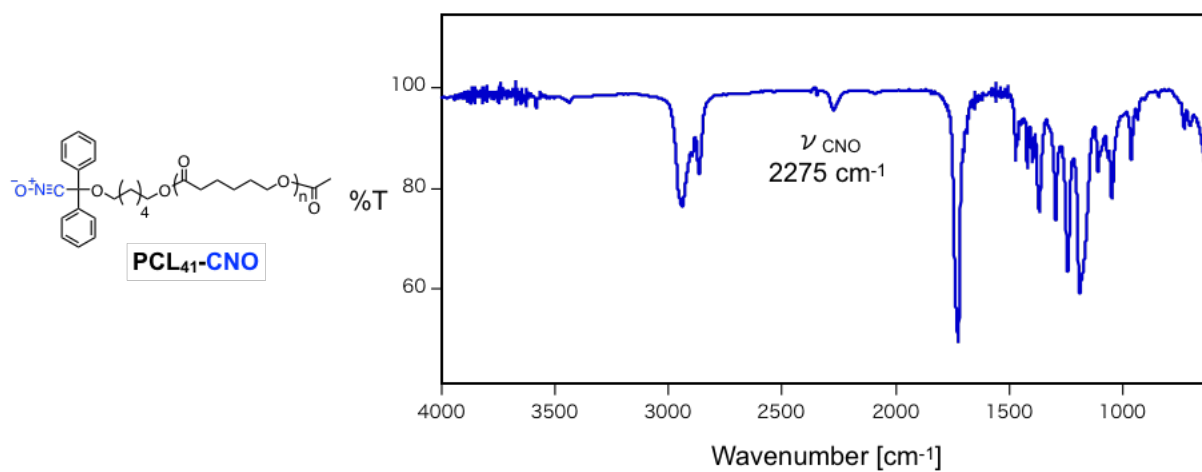

**Figure S28.** FT-IR spectrum of **PCL<sub>41</sub>-CNO** (NaCl)

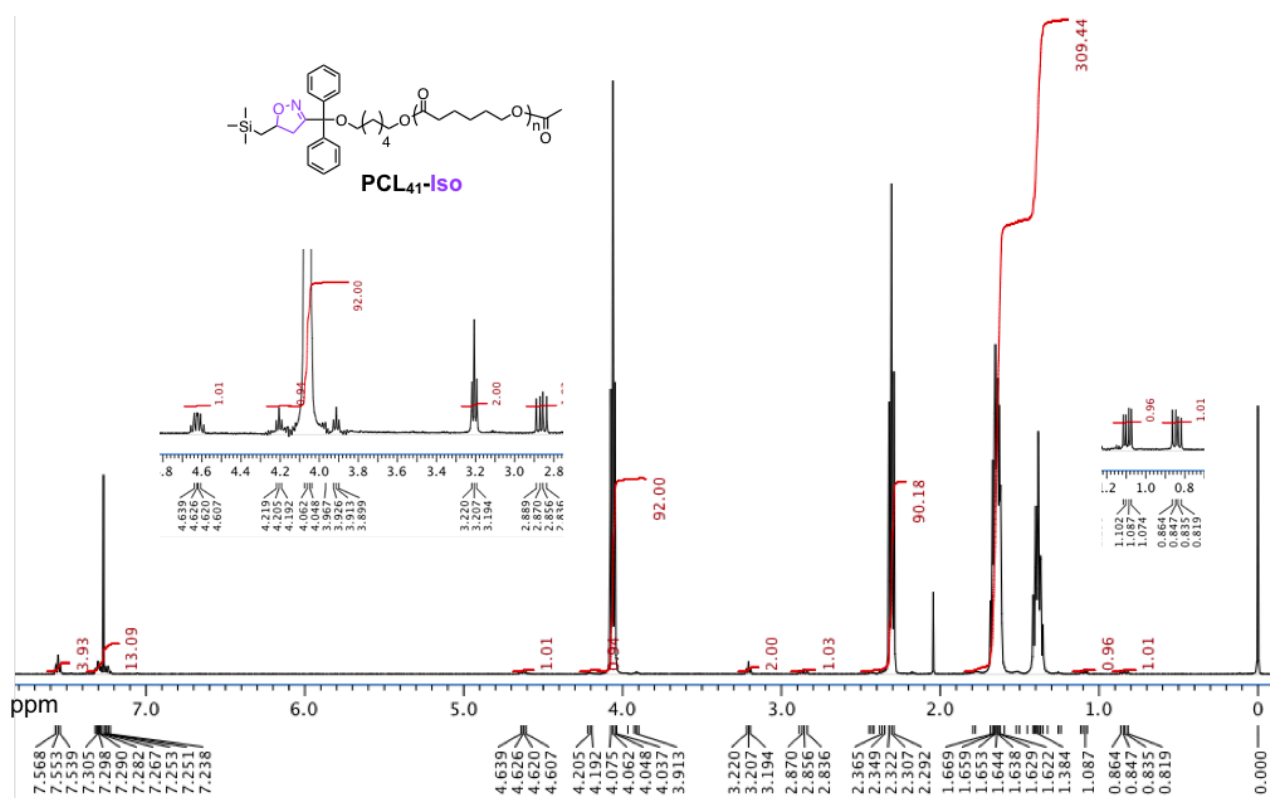

**Figure S29.**  $^1\text{H}$  NMR spectrum of **PCL<sub>41</sub>-Iso** (500 MHz, 298 K,  $\text{CDCl}_3$ )

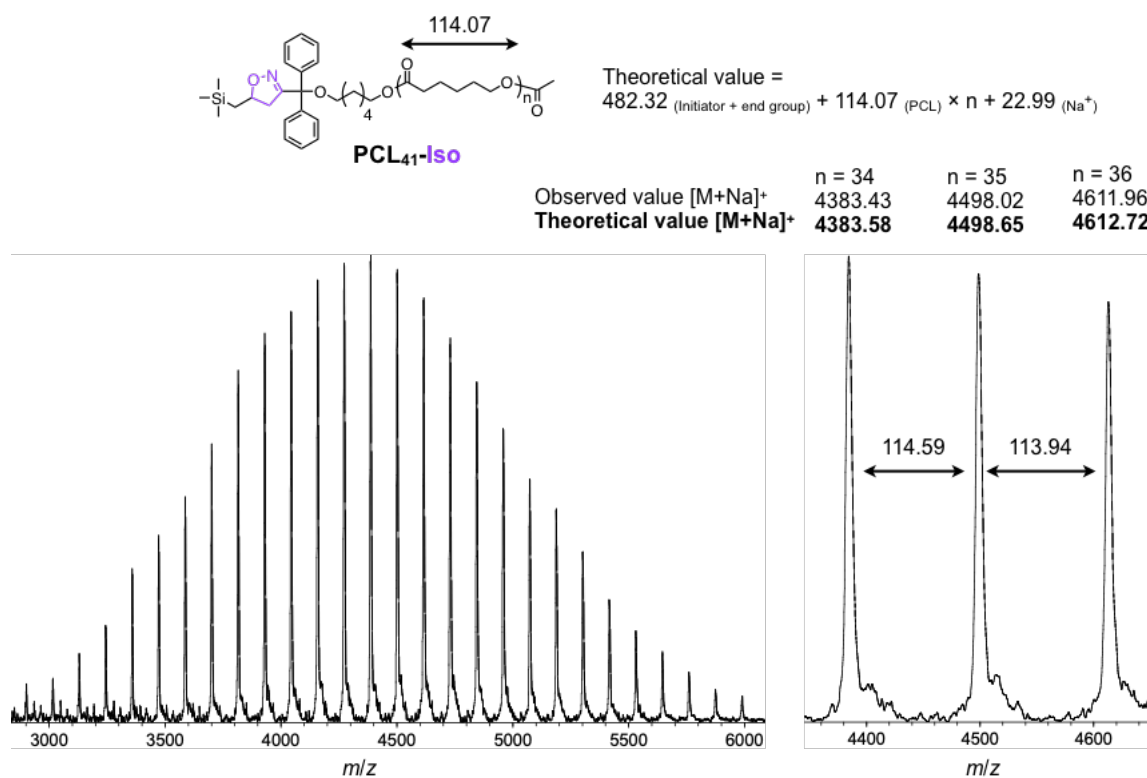

**Figure S30.** MALDI-TOF MS spectrum of **PCL<sub>41</sub>-Iso** (marix: dithranol)

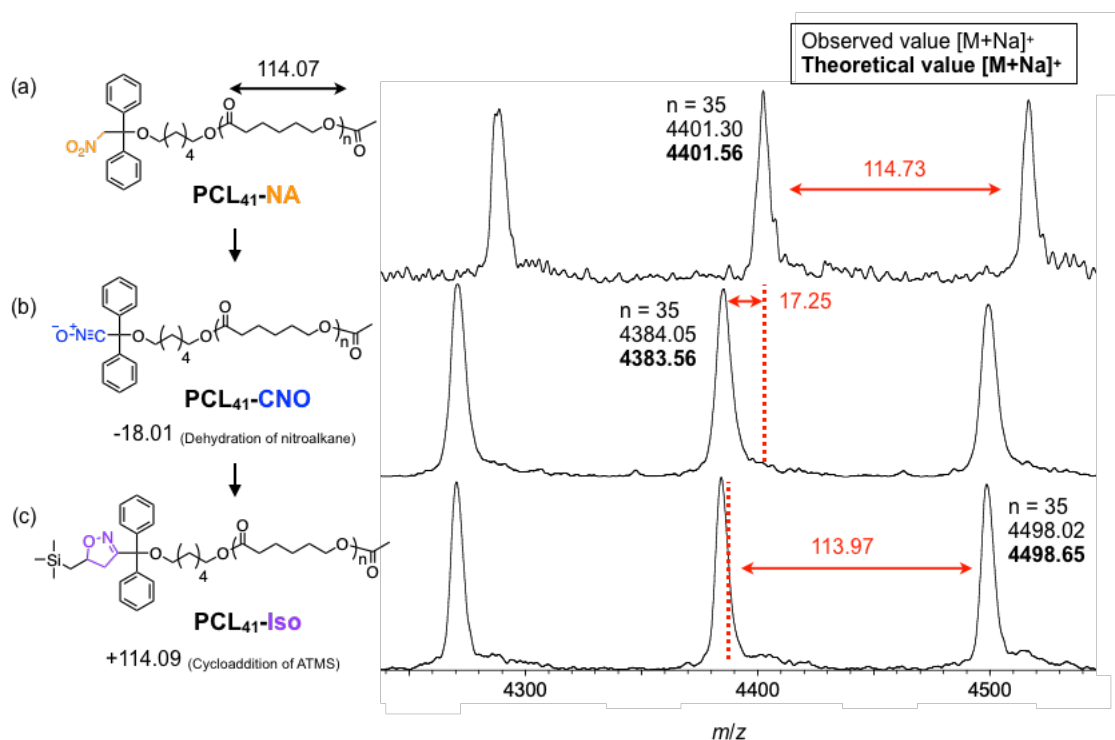

**Figure S31.** MALDI-TOF MS spectra change of (a) **PCL<sub>41</sub>-NA**, (b) **PCL<sub>41</sub>-CNO** and (c) **PCL<sub>41</sub>-Iso** (matrix: dithranol)

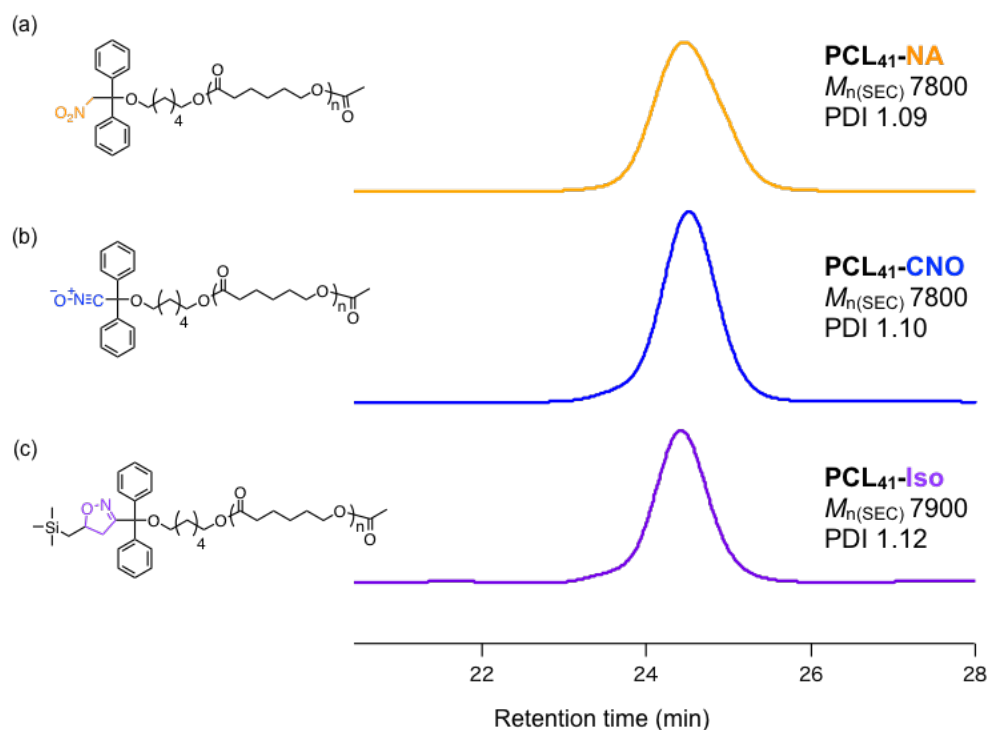

**Figure S32.** SEC charts of (a) **PCL<sub>41</sub>-NA**, (b) **PCL<sub>41</sub>-CNO** and (c) **PCL<sub>41</sub>-Iso** (PS standard, eluent, CHCl<sub>3</sub>; flow rate, 0.85 mL/min, detected by RI)

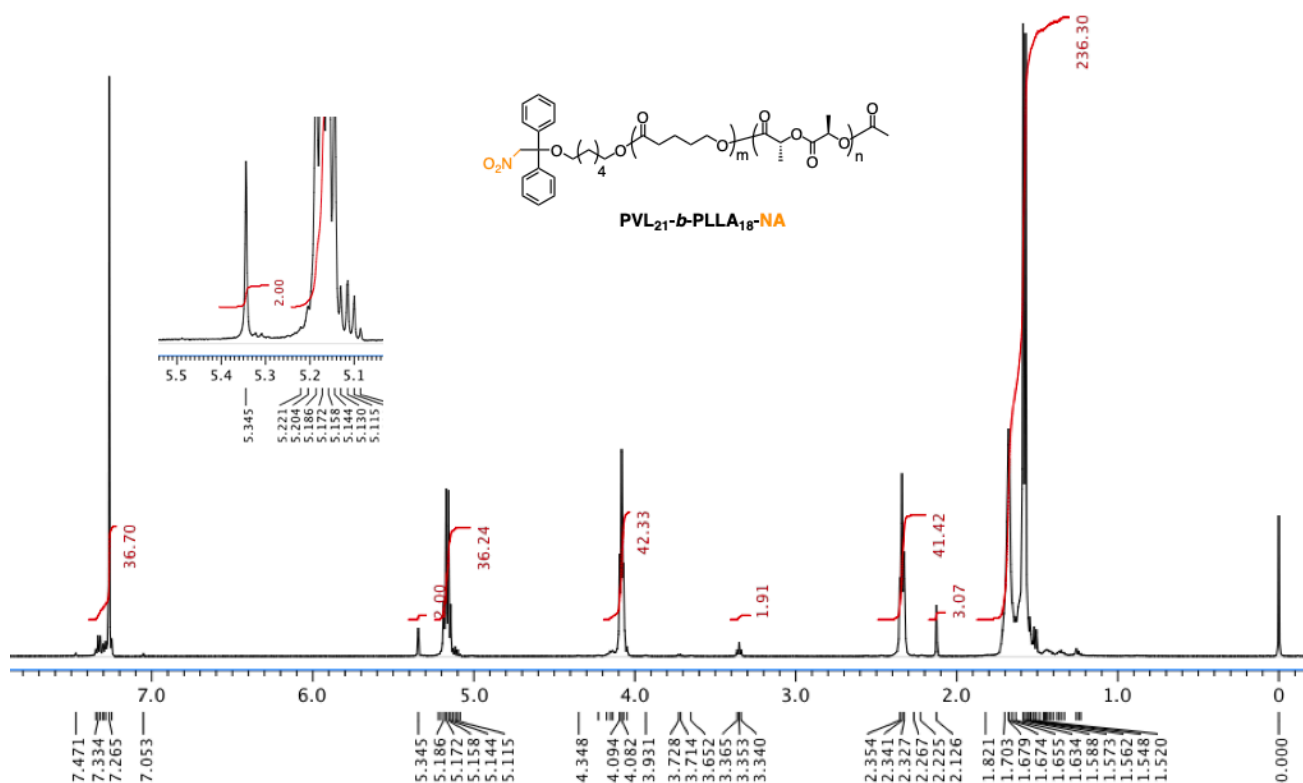

**Figure S33.** <sup>1</sup>H NMR spectrum of **PVL<sub>21</sub>-*b*-PLLA<sub>18</sub>-NA** (500 MHz, 298 K, CDCl<sub>3</sub>)

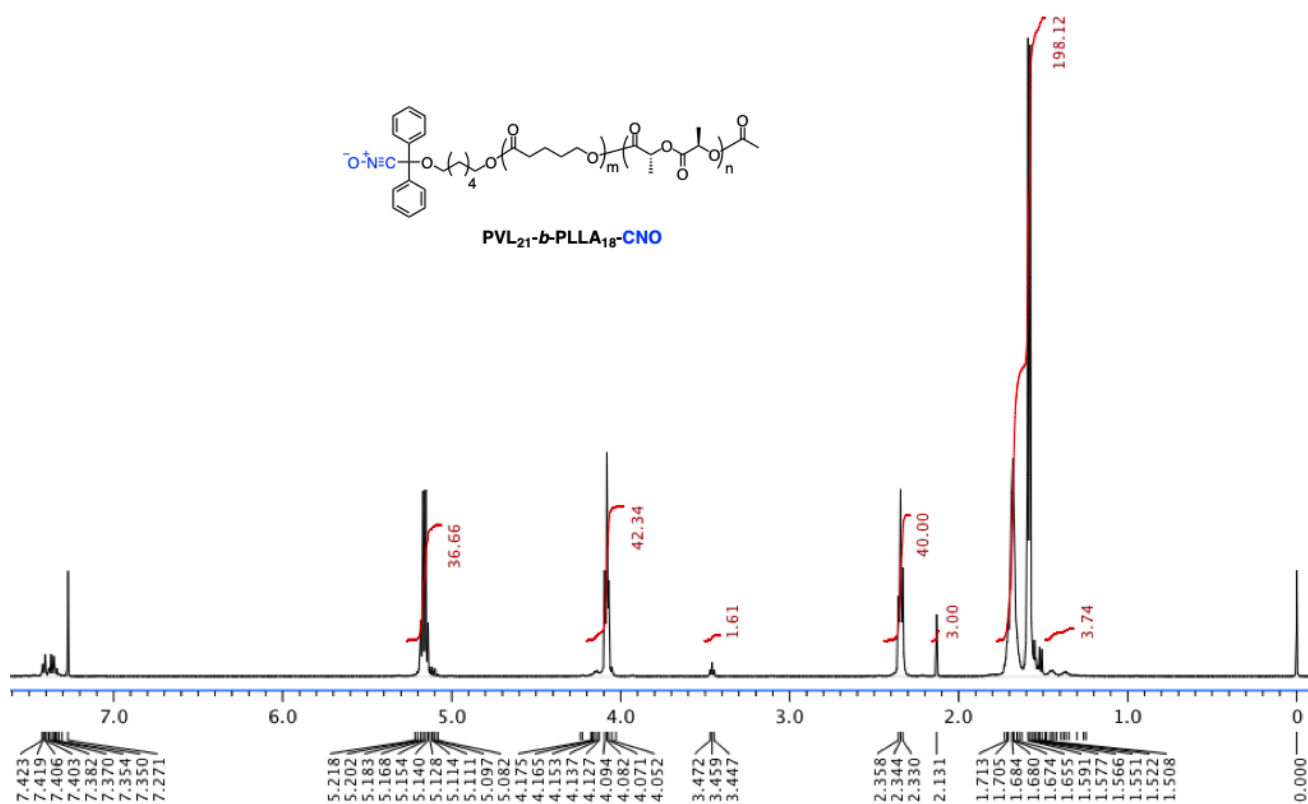

**Figure S34.** <sup>1</sup>H NMR spectrum of **PVL<sub>21</sub>-*b*-PLLA<sub>18</sub>-CNO** (500 MHz, 298 K, CDCl<sub>3</sub>)

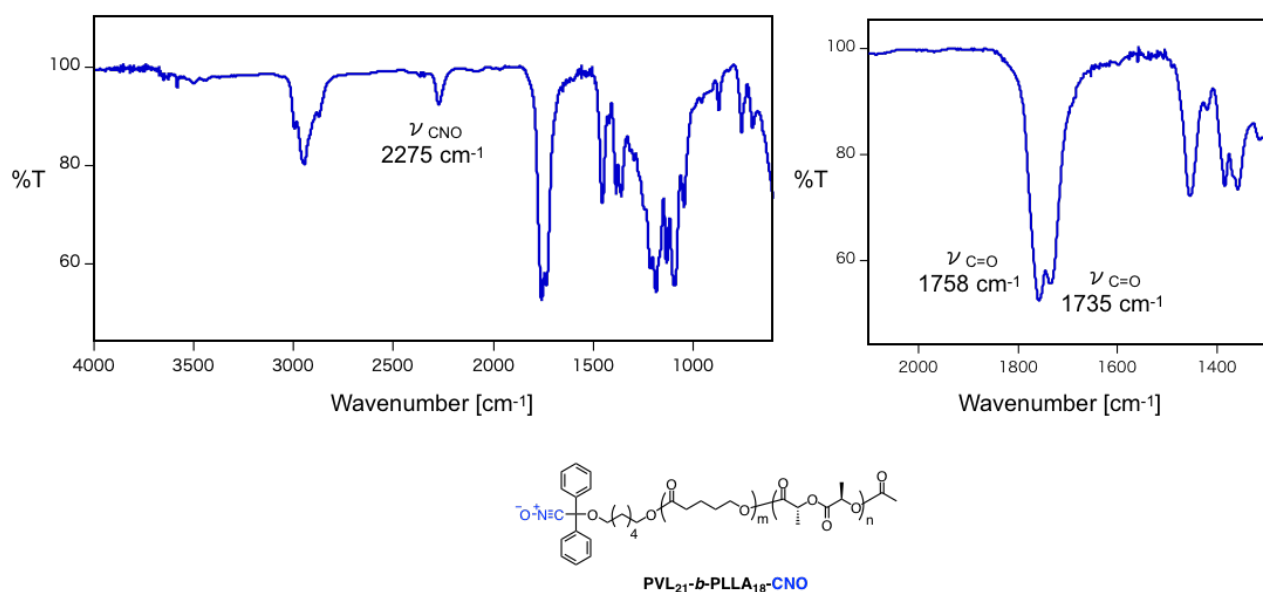

**Figure S35.** FT-IR spectrum of **PVL<sub>21</sub>-*b*-PLLA<sub>18</sub>-CNO (NaCl)**

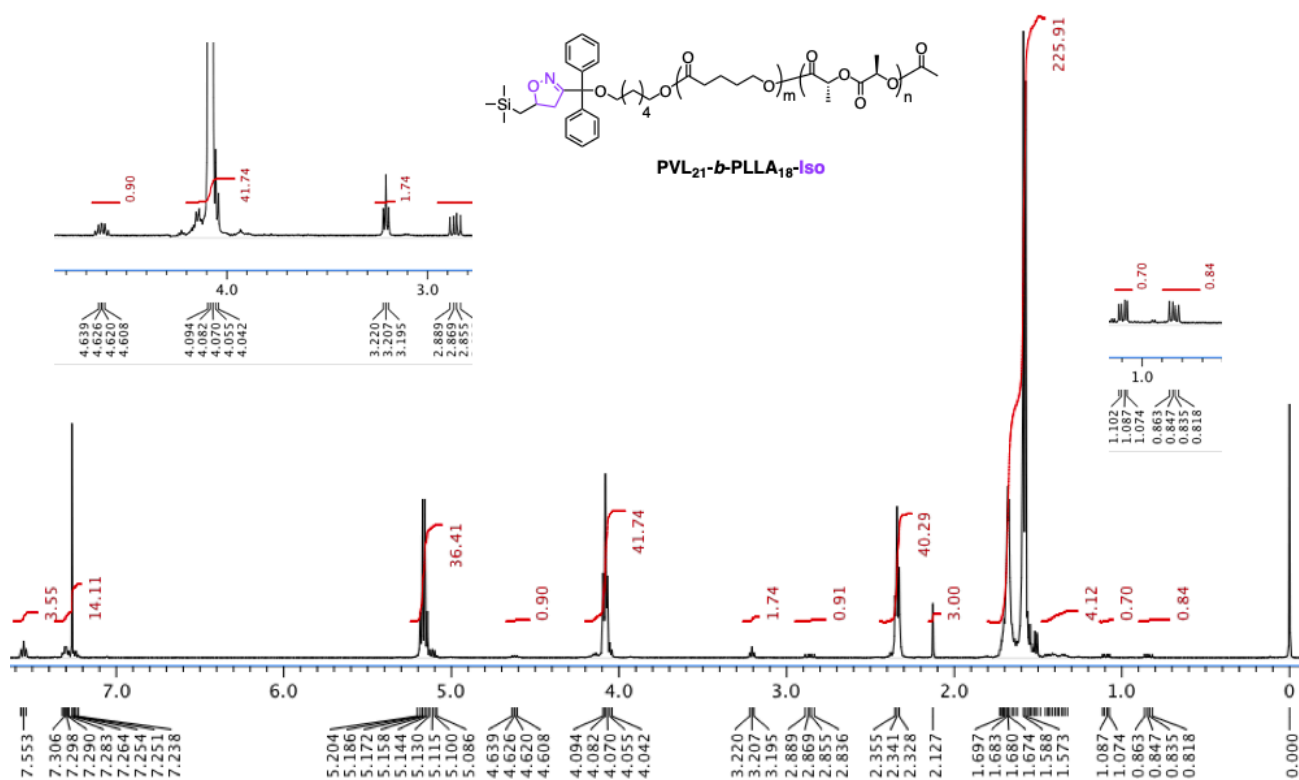

**Figure S36.** <sup>1</sup>H NMR spectrum of **PVL<sub>21</sub>-*b*-PLLA<sub>18</sub>-Iso** (500 MHz, 298 K, CDCl<sub>3</sub>)

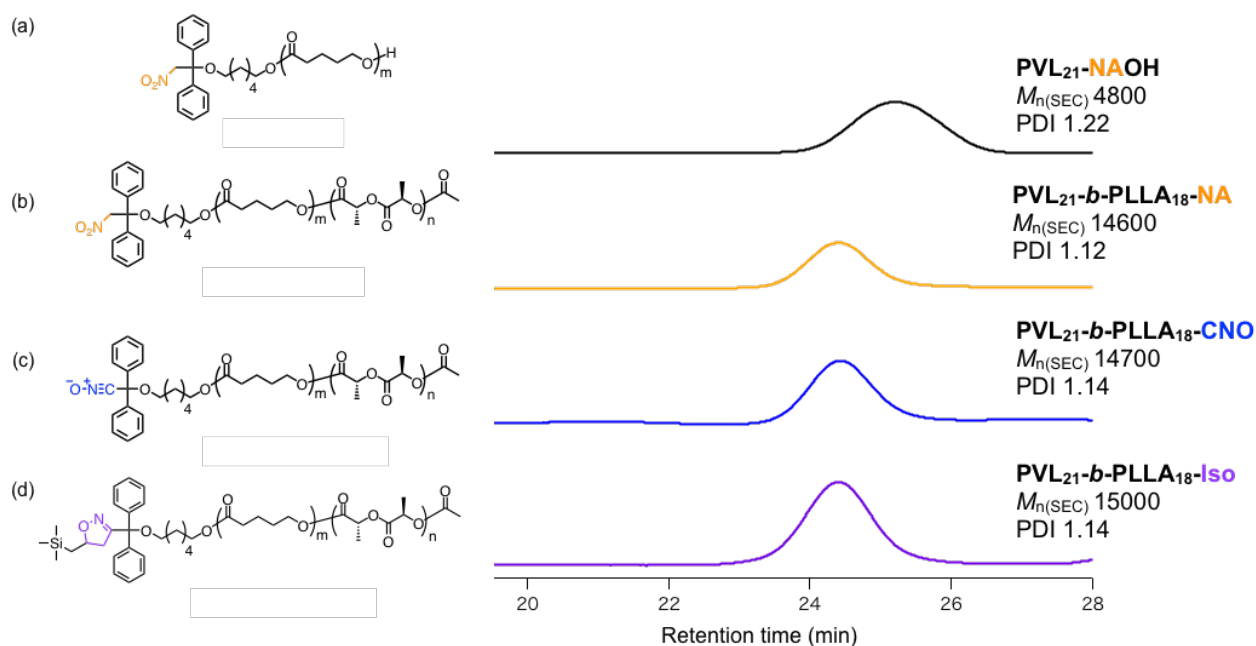

**Figure S37.** SEC charts of (a) **PVL<sub>21</sub>-b-PLLA<sub>18</sub>-NA**, (b) **PVL<sub>21</sub>-b-PLLA<sub>18</sub>-CNO** and (c) **PVL<sub>21</sub>-b-PLLA<sub>18</sub>-Iso** (PS standard, eluent, CHCl<sub>3</sub>; flow rate, 0.85 mL/min, detected by RI)

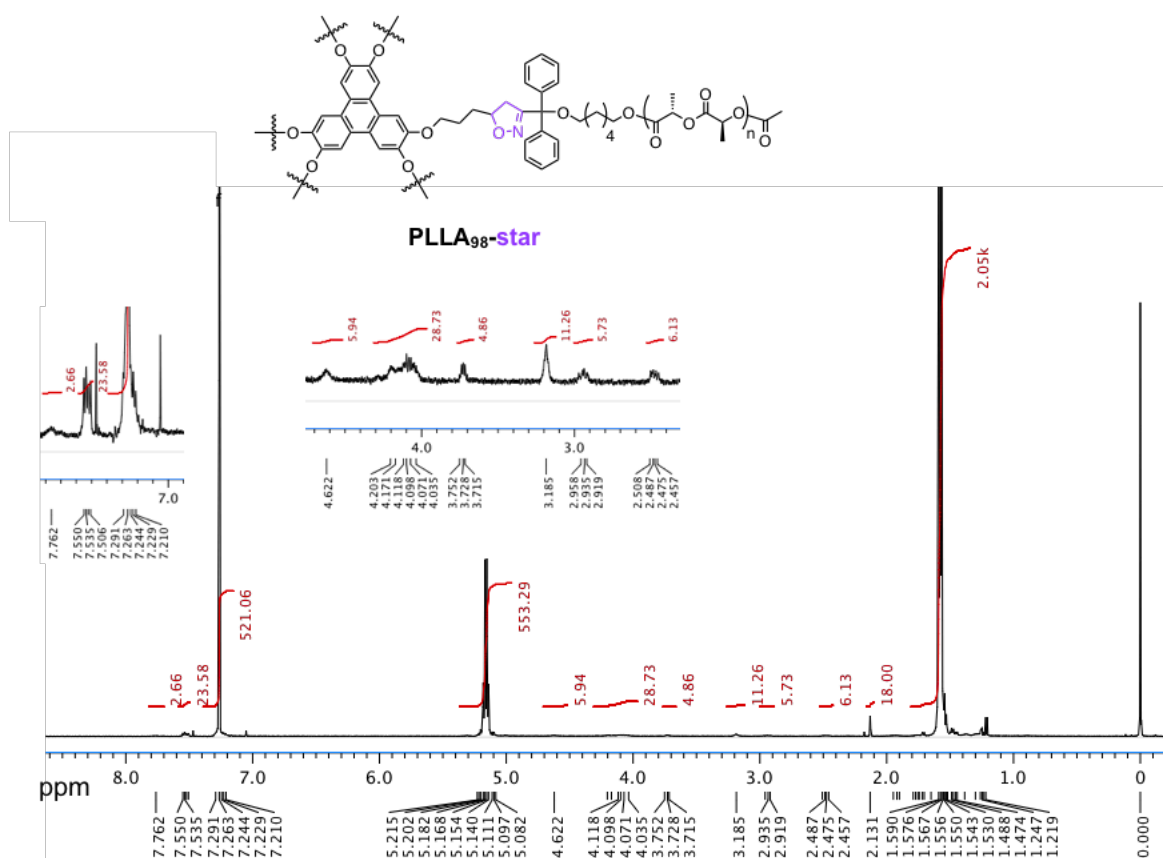

**Figure S38.** <sup>1</sup>H NMR spectrum of **PLLA<sub>98</sub>-star** (500 MHz, 298 K, CDCl<sub>3</sub>)



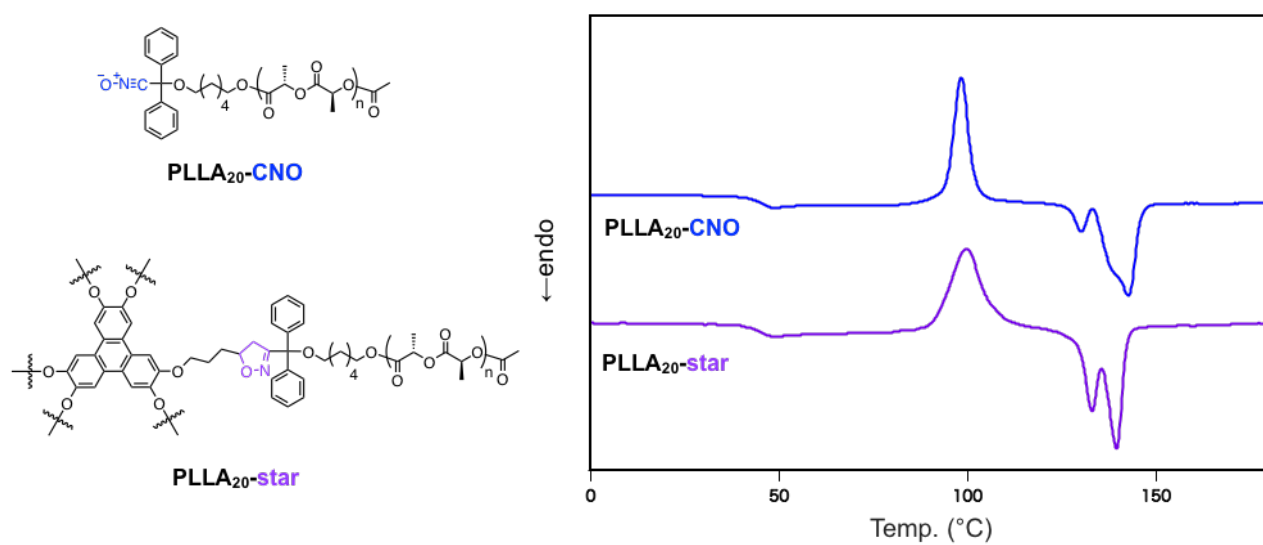

**Figure S39.** DSC charts of PLLA<sub>20</sub>-CNO and PLLA<sub>20</sub>-star (10 °C/min, 2nd heating under N<sub>2</sub>)

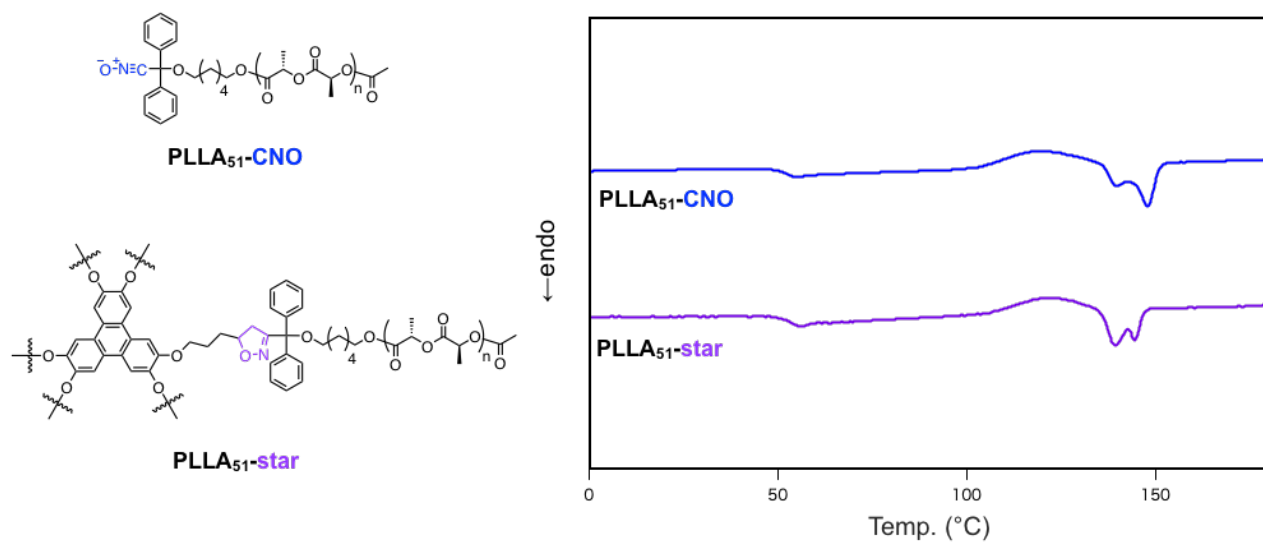

**Figure S40.** DSC charts of PLLA<sub>51</sub>-CNO and PLLA<sub>51</sub>-star (10 °C/min, 2nd heating under N<sub>2</sub>)

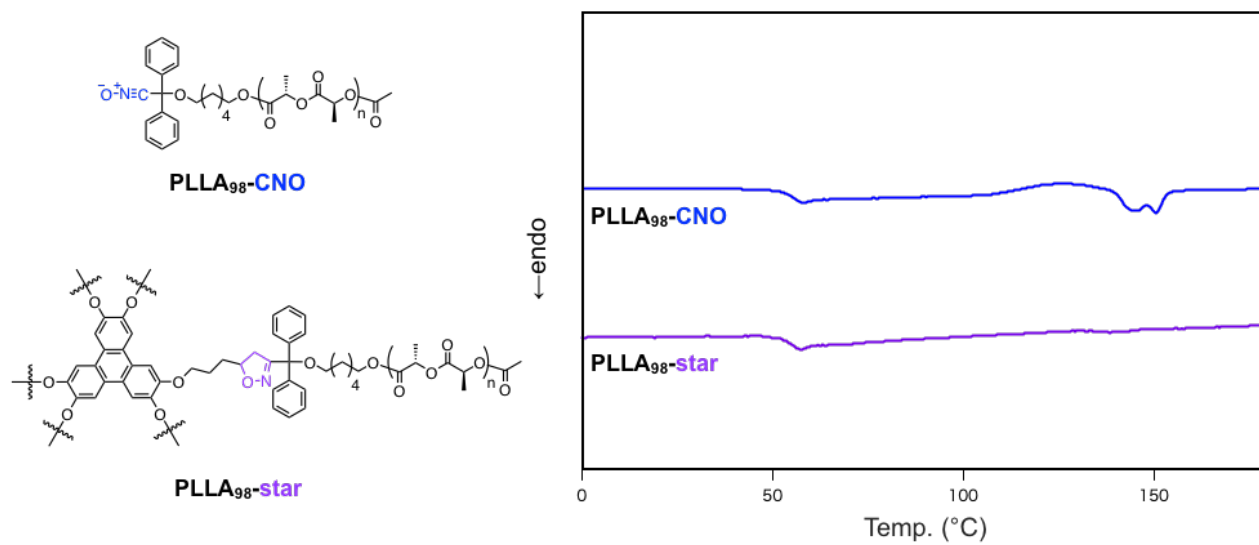

**Figure S41.** DSC charts of PLLA<sub>98</sub>-CNO and PLLA<sub>98</sub>-star (10 °C/min, 2nd heating under N<sub>2</sub>)

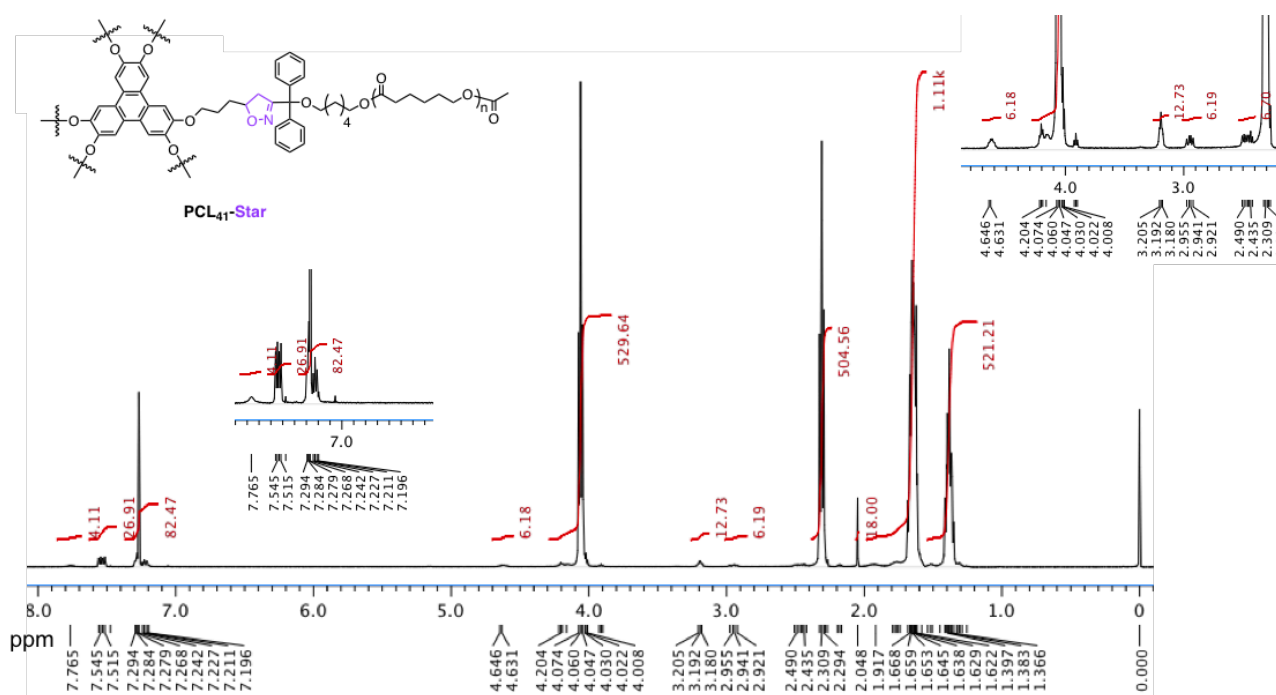

**Figure S42.** <sup>1</sup>H NMR spectrum of PCL<sub>41</sub>-star (500 MHz, 298 K, CDCl<sub>3</sub>)



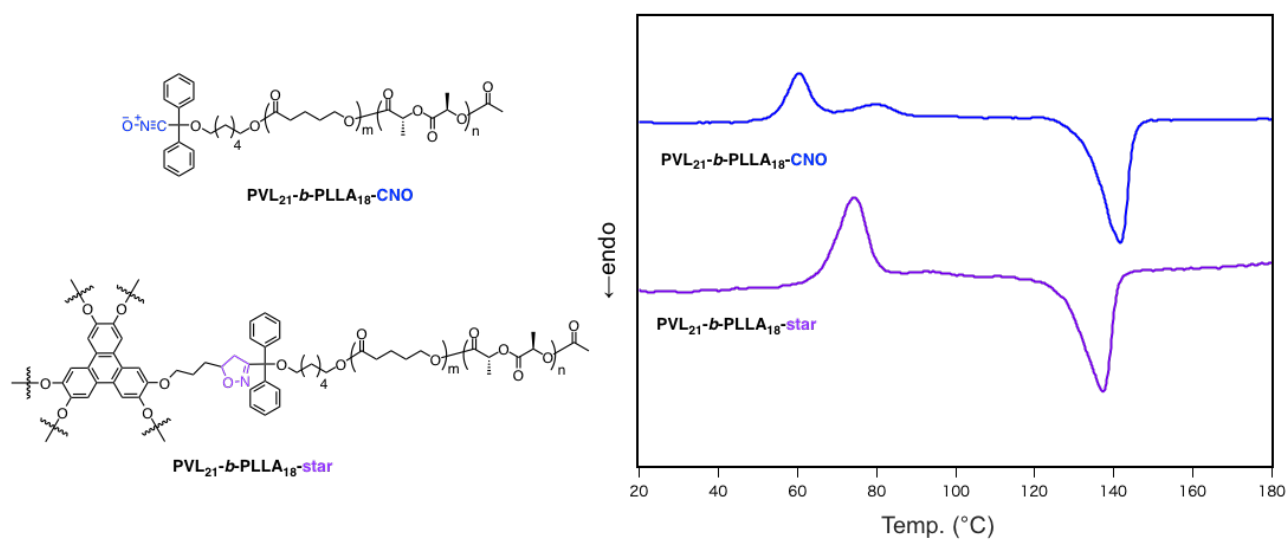

**Figure S45.** DSC charts of **PVL<sub>21</sub>-*b*-PLLA<sub>18</sub>-CNO** and **PVL<sub>21</sub>-*b*-PLLA<sub>18</sub>-star** (10 °C/min, 2nd heating under N<sub>2</sub>)

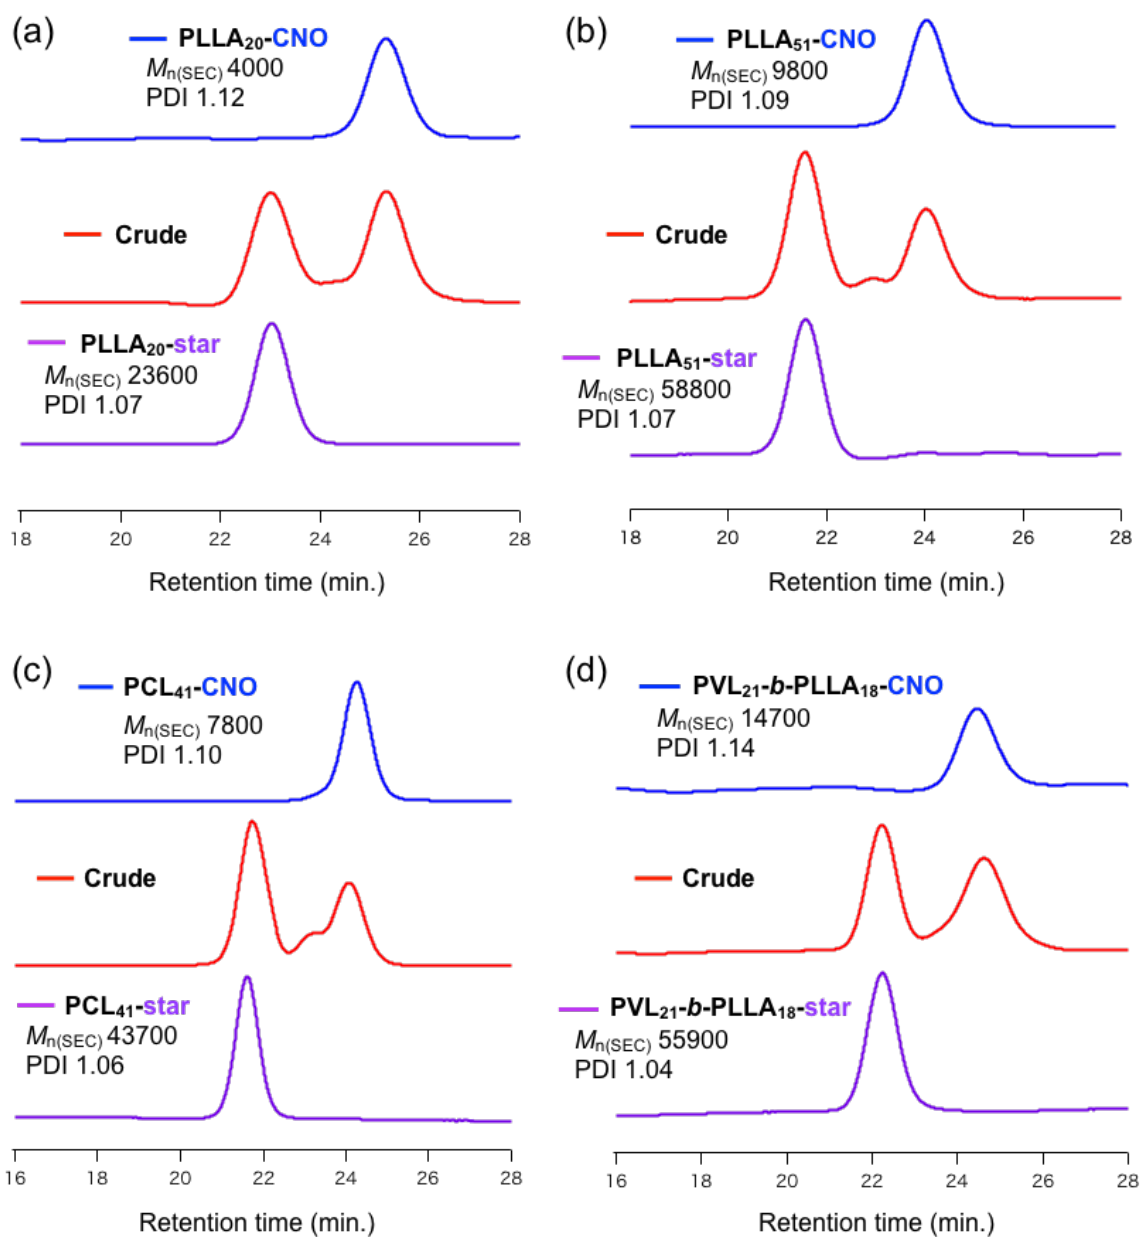

**Figure S46** SEC charts of (a) **PLLA<sub>20</sub>-CNO**, crude and **PLLA<sub>20</sub>-star**, (b) **PLLA<sub>51</sub>-CNO**, crude and **PLLA<sub>51</sub>-star**, (c) **PCL<sub>41</sub>-CNO**, crude and **PCL<sub>41</sub>-star** and (d) **PVL<sub>21</sub>-*b*-PLLA<sub>18</sub>-CNO**, crude and **PVL<sub>21</sub>-*b*-PLLA<sub>18</sub>-star** (PS standard, eluent, CHCl<sub>3</sub>; flow rate, 0.85 mL/min, detected by RI)

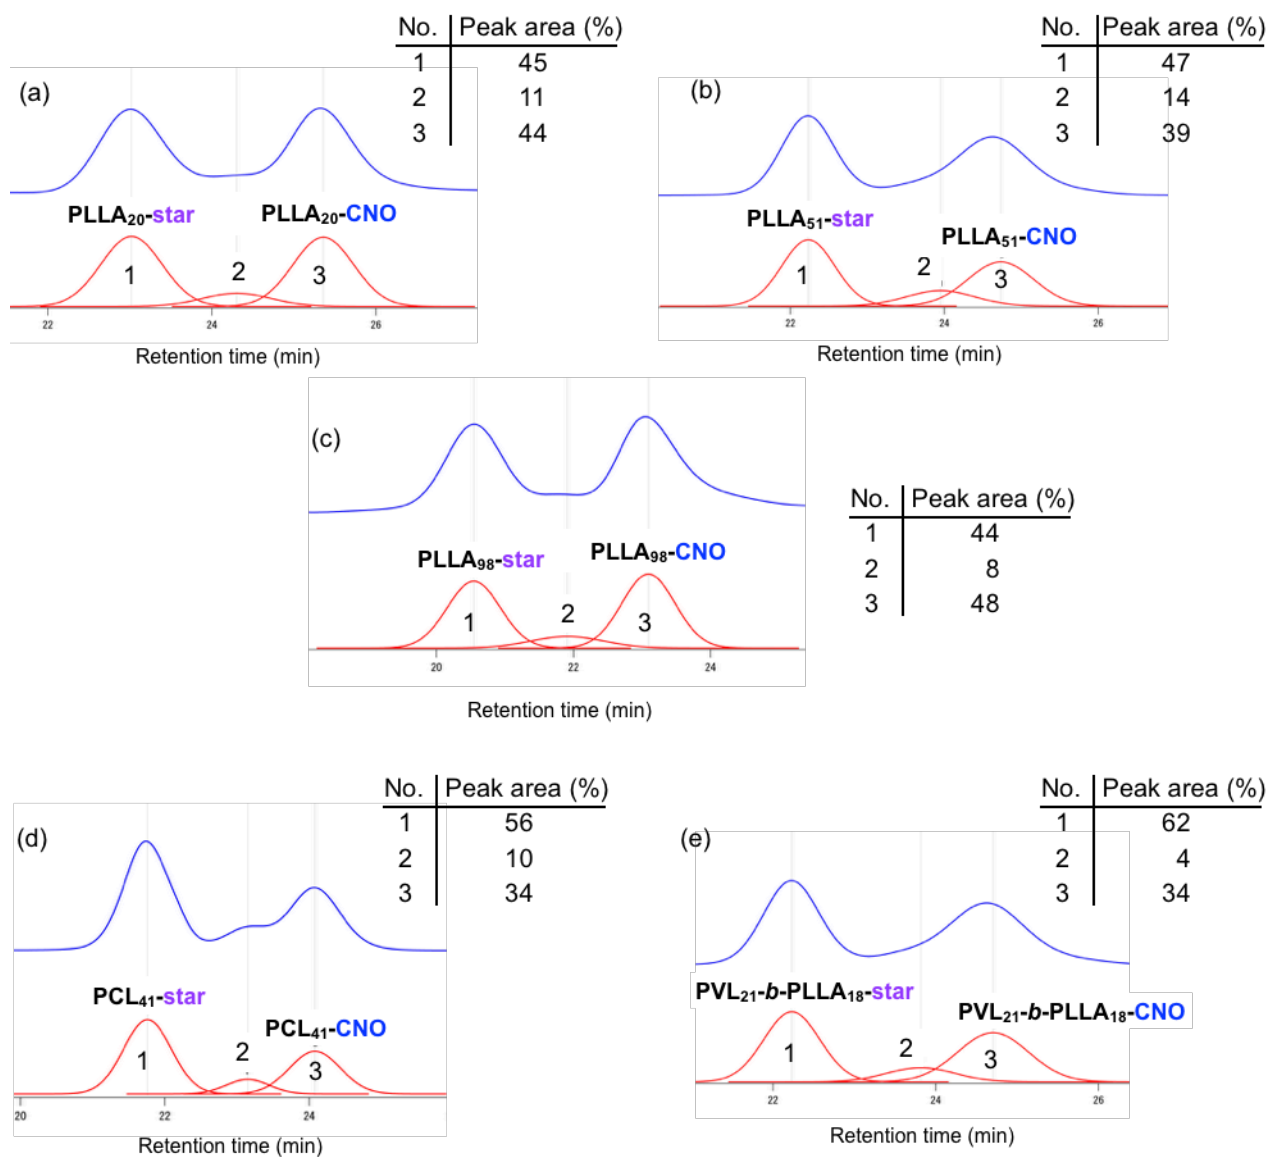

**Figure S47** Peak separation of crude SEC charts of (a) PLLA<sub>20</sub>-star, (b) PLLA<sub>51</sub>-star, (c) PLLA<sub>98</sub>-star, (d) PCL<sub>41</sub>-star and (e) PVL<sub>21</sub>-b-PLLA<sub>18</sub>-star.

Table S1. Thermal properties of **PX-CNO** and **PX-star**

| Polyester                                               | $T_{d5}$ (°C) <sup>a)</sup> | $T_g$ (°C) <sup>b)</sup> | $T_m$ (°C) <sup>b)</sup> |
|---------------------------------------------------------|-----------------------------|--------------------------|--------------------------|
| <b>PLLA<sub>20</sub>-CNO</b>                            | 276                         | 43.2                     | 140                      |
| <b>PLLA<sub>20</sub>-star</b>                           | 283                         | 44.1                     | 138                      |
| <b>PLLA<sub>51</sub>-CNO</b>                            | 309                         | 49.6                     | 148                      |
| <b>PLLA<sub>51</sub>-star</b>                           | 311                         | 51.2                     | 142                      |
| <b>PLLA<sub>98</sub>-CNO</b>                            | 328                         | 52.6                     | 151                      |
| <b>PLLA<sub>98</sub>-star</b>                           | 331                         | 54.2                     | - <sup>c)</sup>          |
| <b>PCL<sub>41</sub>-CNO</b>                             | 332                         | - <sup>c)</sup>          | 52.0                     |
| <b>PCL<sub>41</sub>-star</b>                            | 322                         | - <sup>c)</sup>          | 48.1                     |
| <b>PVL<sub>21</sub>-<i>b</i>-PLLA<sub>18</sub>-CNO</b>  | 315                         | - <sup>c)</sup>          | 142                      |
| <b>PVL<sub>21</sub>-<i>b</i>-PLLA<sub>18</sub>-star</b> | 298                         | - <sup>c)</sup>          | 137                      |

a) Determined by TGA. b) Determined by DSC. c) Not observed.

### 3. *Reference*

- S1. C-G. Wang, Y. Koyama, M. Yonekawa, S. Uchida and T. Takata, *Chem. Commun.*, 2013, **49**, 7723.  
S2. A. Zelcer, B. Donnio, C. Bourgogne, F. D. Cukiernik, and D. Guillon, *Chem. Mater.*, 2007, **19**, 1992.
